# Supplementary material for: The association between submarine service and multimorbidity: a cross-sectional study of Korean naval personnel
Source: PubMed Central journal article supplement — BMJ Open. 2017 Sep 24;7(9):e017776. doi: 10.1136/bmjopen-2017-017776 (PMC5623552; doi:10.1136/bmjopen-2017-017776), 2017-09-24
Supplement: bmjopen-2017-017776.draft_revisions.pdf [file bmjopen-2017-017776.draft_revisions.pdf]

# BMJ Open

BMJ Open is committed to open peer review. As part of this commitment we make the peer review history of every article we publish publicly available.

When an article is published we post the peer reviewers' comments and the authors' responses online. We also post the versions of the paper that were used during peer review. These are the versions that the peer review comments apply to.

The versions of the paper that follow are the versions that were submitted during the peer review process. They are not the versions of record or the final published versions. They should not be cited or distributed as the published version of this manuscript.

BMJ Open is an open access journal and the full, final, typeset and author-corrected version of record of the manuscript is available on our site with no access controls, subscription charges or pay-per-view fees (<http://bmjopen.bmj.com>).

If you have any questions on BMJ Open's open peer review process please email [editorial.bmjopen@bmj.com](mailto:editorial.bmjopen@bmj.com)

# BMJ Open

## Association between submarine service and multi-morbidity among Korean naval personnel

|                                 |                                                                                                                                                         |
|---------------------------------|---------------------------------------------------------------------------------------------------------------------------------------------------------|
| Journal:                        | <i>BMJ Open</i>                                                                                                                                         |
| Manuscript ID                   | bmjopen-2017-017776                                                                                                                                     |
| Article Type:                   | Research                                                                                                                                                |
| Date Submitted by the Author:   | 16-May-2017                                                                                                                                             |
| Complete List of Authors:       | Kang, Jihun; Kosin University College of Medicine, Department of Family Medicine<br>Song, Yun-Mi; Samsung Medical Center, Department of Family Medicine |
| <b>Primary Subject Heading</b>: | Epidemiology                                                                                                                                            |
| Secondary Subject Heading:      | General practice / Family practice                                                                                                                      |
| Keywords:                       | submarine, multimorbidity, disease burden                                                                                                               |
|                                 |                                                                                                                                                         |

SCHOLARONE™  
Manuscripts

Peer Review Only

1  
2  
3  
4 **Association between submarine service and multi-morbidity among Korean naval personnel**  
5  
6  
7

8  
9  
10 Jihun Kang, MD, MS<sup>1</sup> and Yun-Mi Song, MD, MPH, PhD<sup>2</sup>  
11

12  
13  
14  
15 <sup>1</sup>Department of Underwater Medicine, Maritime Medical Research Center, the Republic of Korea  
16  
17  
18 Navy, Changwon, Korea  
19

20  
21 <sup>2</sup>Department of Family Medicine, Samsung Medical Center, Sungkyunkwan University School of  
22  
23  
24 Medicine, Seoul, Republic of Korea  
25  
26  
27  
28

29 **Corresponding author:**  
30

31  
32 Yun-Mi Song, MD, MPH, PhD  
33

34  
35 Department of Family Medicine, Samsung Medical Center, Sungkyunkwan University School of  
36  
37  
38 Medicine  
39

40  
41 81 Irwon-ro, Gangnam-gu, Seoul 135-710, Republic of Korea  
42

43  
44 Tel: +82-2-3410-2442  
45

46  
47 Fax: +82-2-3410-0388  
48

49  
50 Email: [yunmisong@skku.edu](mailto:yunmisong@skku.edu)  
51  
52  
53  
54  
55  
56  
57  
58  
59  
60

**Contributorship statement**

Dr. Jihun Kang (1<sup>st</sup> author) contributed to building the conception and design of the work, data collection, analyzing and interpretation of data and drafting and revising the article.

Prf. Yun-Mi Song(Corresponding author) contributed to building the conception and design of the work, analyzing and interpretation of data, clarifying important intellectual content of the result and critical revision from draft version to final version of the article.

Both authors participated in final approval of the version to be published and contributed to ensuing that questions related to the accuracy or integrity of any part of the work are appropriately investigated and resolved.

**Abstract**

*Objective:* We aimed to estimate the prevalence of multi-morbidity ( $\geq 2$  chronic health problems) among Korean submariners, and to evaluate the associations of submarine service with multi-morbidity and disease burden.

*Study Design and Setting:* This cross-sectional study included 590 naval personnel who visited a Korean primary care clinic during 2014–2015. Data regarding general characteristics and morbidities were collected from medical records, and disease burden was assessed using the Cumulative Illness Rating Scale (CIRS). Multiple logistic analysis was used to evaluate the associations of submarine service with multi-morbidity and disease burden.

*Results:* The prevalence of multi-morbidity were 11.7% among 180 non-submariners and 32.2% among 410 submariners. The prevalence of multi-morbidity and the CIRS scores gradually increased with age. Significant positive age-adjusted associations were found between the years of submarine service and multi-morbidity and high disease burden (CIRS score of  $\geq 3$ ) (P for trend  $< 0.001$ ). These associations remained significant after adjusting for age, alcohol consumption, smoking status, and naval rank.

*Conclusions:* Submarine service was significantly associated with a higher risk of multi-morbidity and greater disease burden, compared to non-submarine service. This finding suggests that multi-dimensional and holistic healthcare approaches are needed for submariners.

**Keywords:** Submarine, multi-morbidity, disease burden

## Article summary

### Strengths and limitations of this study

This study investigated multi-morbidity and disease burden among submariners, who have unique characteristics and working environments.

We reviewed the data from medical records retrospectively and analyzed the association between service length in submarine and multi-morbidity and disease burden.

The cross-sectional design makes difficult to conclude the direction of causality regarding the relationship between submarine service and risk of multi-morbidity

The specificity of our study population, Korean submariners, would limit the generalization of our findings to other populations.

#### 1. What is already known about this subject?

Multimorbidity (coexistence of  $\geq 2$  long-term diseases or medical conditions) is an increasing public health concern. Although various studies have evaluated multimorbidity among older individuals, no studies have evaluated multimorbidity among submariners, who have unique characteristics and working environments.

#### 2. What are the new findings?

- A substantial proportion of submariners had multi-morbidity.

1  
2  
3  
4 - Submarine service was associated with a higher risk of multi-morbidity, compared to non-  
5  
6  
7 submariner service.

8  
9  
10 - Submarine service was associated with a greater disease burden (assessed using the Cumulative  
11  
12 Illness Rating Scale), compared to non-submarine service.

13  
14  
15  
16  
17  
18 3.How might it impact on policy or clinical practice in the foreseeable future?

19  
20  
21 Multi-dimensional approaches and holistic healthcare are needed to manage the multiple medical  
22  
23 conditions that submariners may experience.  
24  
25  
26  
27  
28  
29  
30  
31  
32  
33  
34

## 35 INTRODUCTION

36  
37 Multi-morbidity (the coexistence of  $\geq 2$  long-term diseases or medical conditions in one person)  
38  
39 is associated with increased medical expenditures <sup>1</sup>, decreased quality of life <sup>2</sup>, and higher  
40  
41 mortality <sup>3</sup>. With increasing life expectancy and population aging <sup>4</sup>, multi-morbidity has become  
42  
43 an important public health issue <sup>5</sup>, because elderly people are likely to have multiple coexisting  
44  
45 medical conditions. Therefore, most multi-morbidity research has been performed among older  
46  
47 populations <sup>3,6</sup>, although multi-morbidity is not just an issue for elderly people <sup>7</sup>. A recent study  
48  
49 found that >50% of people with multiple medical conditions were <65 years old <sup>8</sup>, which implies  
50  
51  
52  
53  
54  
55  
56  
57  
58  
59  
60

1  
2  
3  
4 that multi-morbidity should be investigated in a broader age range <sup>9</sup>.  
5  
6

7 Military personnel are often relatively young people who perform physical training, military  
8  
9 drilling, and deployment. Among military personnel, submariners complete a specialized selection  
10  
11 process and training to ensure that they can complete their demanding duties. Therefore,  
12  
13 submariners are considered a relatively healthy group at the time of their recruitment <sup>10</sup>. However,  
14  
15 submariners are exposed to various environmental factors that can affect their health status, such  
16  
17 as their confined work environment, physical inactivity, excessive caloric intake, circadian  
18  
19 disruption, and isolation from family during deployment <sup>11, 12</sup>. Previous studies of submariners  
20  
21 have revealed associations between these factors and increased risks of mortality or specific  
22  
23 diseases <sup>13, 14</sup>. Nevertheless, little is known regarding the influence of submarine service on multi-  
24  
25 morbidity.  
26  
27  
28  
29  
30  
31  
32  
33  
34

35 Therefore, the present study aimed to estimate the prevalence of multi-morbidity among  
36  
37 Korean submariners, and to evaluate the associations of submarine service with multi-morbidity  
38  
39 and disease burden by comparing submariners and non-submarine naval personnel.  
40  
41  
42  
43  
44

## 45 46 **METHODS AND MATERIALS**

### 47 48 *Study design and participants*

49  
50  
51 This cross-sectional retrospective study analyzed data from the medical records of naval  
52  
53 personnel who visited a primary care facility at the military base in Jinhae (Republic of Korea)  
54  
55  
56  
57  
58  
59  
60



1  
2  
3  
4 between April 2014 and March 2015. Among the 1,004 individuals who visited the clinic, we  
5  
6  
7 excluded 332 persons who had a temporary service commission and 82 persons with missing  
8  
9  
10 information regarding their socio-demographic characteristics (N = 15) or disease status (N = 67).  
11  
12 Thus, 590 permanently commissioned naval personnel were ultimately included in the present  
13  
14 study. We defined submariners as person who completed submarine training courses and worked  
15  
16 in a submarine for  $\geq 6$  months, and categorized the subjects as either submariners (410 persons)  
17  
18 or non-submariners (180 persons).  
19  
20  
21  
22  
23

24 The study's retrospective protocol was approved and the requirement of informed consent was  
25  
26 waived by the institutional review board of the Armed Forces Medical Command in Seongnam,  
27  
28 South Korea (AFMC-15088-IRB-15-068).  
29  
30  
31

### 32 *Data collection*

33  
34 The subjects' socio-demographic data (age, years of submarine service, and naval rank),  
35  
36 anthropometric data (height and weight), and health behaviors (smoking status and alcohol  
37  
38 consumption) were obtained by reviewing their medical records. Body mass indexes (BMI,  $\text{kg}/\text{m}^2$ )  
39  
40 were calculated as weight divided by height squared, and we defined obesity as a BMI of  $\geq 25$   
41  
42  
43  
44  
45  
46  $\text{kg}/\text{m}^2$ <sup>15</sup>.  
47

48  
49 Co-existing chronic health problems were identified by reviewing the subjects' medical record  
50  
51 and using a questionnaire regarding their medical history and symptoms, such as diabetes,  
52  
53  
54 chronic obstructive pulmonary disorder, asthma, hypertension, dyslipidemia, heart disease  
55  
56  
57

1  
2  
3  
4 (congestive heart failure and ischemic heart disease), stroke, gastro-esophageal reflux, sleep apnea,  
5  
6  
7 arthritis, kidney disease, and psychological disorders. The presence of multi-morbidity ( $\geq 2$  chronic  
8  
9 medical conditions) was evaluated by counting the number of chronic health conditions that each  
10  
11 subject had.  
12  
13

14  
15 We estimated disease burdens based on the illnesses and their severities using the Cumulative  
16  
17 Illness Rating Scale (CIRS)<sup>16</sup>. This tool assesses symptoms in 14 organ domains (cardiac; vascular;  
18  
19 hematological; respiratory; eyes, ear, nose, and throat; upper gastrointestinal tract; lower  
20  
21 gastrointestinal tract; hepatic and pancreatic; renal; genitourinary; musculoskeletal and tegumental;  
22  
23 neurological; endocrine, metabolic, breast; and psychiatric). The CIRS was originally developed by  
24  
25 Linn et al.<sup>17</sup> to assess chronic medical problems in a comprehensive manner, and was  
26  
27 subsequently revised by Miller et al.<sup>18</sup> to measure common morbidities among elderly patients.  
28  
29 This tool was later modified by Hudon et al.<sup>16</sup> to estimate multi-morbidity in the primary care  
30  
31 setting, and was found to be a reliable and valid tool<sup>2, 19, 20</sup>. The CIRS score for each organ system  
32  
33 ranges from 0 (no problems affecting that system) to 4 (extremely severe problems), and the total  
34  
35 CIRS score is calculated by adding the scores for all 14 organ domains (range: 0–56). If a person  
36  
37 currently smokes or has a high BMI ( $\geq 25$  kg/m<sup>2</sup>), then the person is considered to have disease  
38  
39 burden in the respiratory and metabolic systems, respectively. The total CIRS score has a left-  
40  
41 skewed distribution because it is very rare for a person to have severe medical conditions in every  
42  
43 organ system.  
44  
45  
46  
47  
48  
49  
50  
51  
52  
53  
54  
55  
56  
57  
58  
59  
60

### *Statistical analyses*

The demographic characteristics, distributions of chronic health problems, and CIRS scores were compared between submariners and non-submariners using the chi-square test and t test, as appropriate. We also compared the distributions of chronic health problems and CIRS scores for three age strata, because the age distributions were significantly different between the submariners and non-submariners. We also evaluated the associations of submarine service with multi-morbidity and high disease burden using multiple logistic regression analysis after adjusting for age, alcohol consumption, smoking status, and naval rank (reference group: non-submariners with 0 years of submarine service). However, we did not include smoking status as a covariate in the model for disease burden, because it is a component of the CIRS score. All statistical analyses were performed using PASW Statistics software (version 21.0; SPSS Inc., Chicago, IL, USA). Two-tailed P-values of <0.05 were considered statistically significant.

### **RESULTS**

Table 1 shows the subjects' characteristics. Compared to non-submariners, submariners were significantly older, were more likely to be a current smoker and obese, and had a higher naval rank ( $p < 0.05$ ). Table 2 shows the distributions of chronic health problems and CIRS scores among all subjects and in the three age strata. The prevalences of multi-morbidity were 11.7% among non-submariners and 32.2% among submariners. The prevalence of multi-morbidity and

1  
2  
3  
4 the CIRS scores gradually increased with age among both submariners and non-submariners. In  
5  
6  
7 all age strata, the number of chronic health problems consistently tended to higher among  
8  
9  
10 submariners, compared to among non-submariners. The mean CIRS score for submariners was  
11  
12 higher than that of non-submariners in all age groups.  
13

14  
15 Table 3 shows the adjusted associations of submarine service with the risks of multi-morbidity  
16  
17 and high disease burden (CIRS of  $\geq 3$ ). With increasing years of submarine service, the risk of  
18  
19 having multi-morbidity and high disease burden (CIRS score of  $\geq 3$ ) tended to increase (P for trend  
20  
21  $< 0.001$ ). This association remained significant after adjusting for age, alcohol consumption,  
22  
23 smoking status, and naval rank.  
24  
25  
26  
27  
28

29 Supplementary Table 1 shows the prevalences of symptoms in each CIRS organ domain.  
30  
31 Compared to non-submariners, submariners more frequently experienced symptoms in the  
32  
33 vascular, respiratory, ear/nose/throat, and endocrine domains. Both groups had similar prevalences  
34  
35 of symptoms in the cardiac, upper and lower gastrointestinal, musculoskeletal or tegumental, and  
36  
37 neurological domains.  
38  
39  
40  
41  
42  
43  
44  
45

## 46 DISCUSSION

47  
48 The present study is the first study to examine the prevalence of multi-morbidity and disease  
49  
50 burden among submariners. Use of the CIRS score allowed us to provide more comprehensive  
51  
52 data, especially regarding the disease burden, compared to previous studies. Based on our  
53  
54  
55  
56  
57  
58  
59  
60

1  
2  
3  
4 findings, approximately 30% of submariners had multi-morbidity, and this rate was approximately  
5  
6  
7 3× greater than the prevalence among non-submariner naval personnel (11.7%). The higher rate  
8  
9  
10 of multi-morbidity among submariners was consistently observed in different age strata, which  
11  
12 suggests that the significant difference in the multi-morbidity rate was not caused by different  
13  
14 age distributions.  
15  
16

17  
18 It is difficult to compare the prevalence of multi-morbidity between different studies, as they  
19  
20 have varying definitions and methods for assessing multi-morbidity. However, a previous study  
21  
22 has confirmed that multi-morbidity prevalence is comparable between studies when multi-  
23  
24 morbidity is defined as  $\geq 2$  disease entities, regardless of the specific disease entity definitions in  
25  
26 each study <sup>21</sup>. Nevertheless, the prevalence of multi-morbidity varies according to study. When we  
27  
28 exclude elderly subjects (to simplify the age-based comparisons), we found that the prevalence of  
29  
30 multi-morbidity among non-submariners was 11.7%, which was lower than the reported  
31  
32 prevalences in the Netherlands (24.2% among 20–59-year-old men from the general population)  
33  
34 <sup>22</sup>, Scotland (20.5% among 25–65-year-old men from the general population) <sup>8</sup>, and Canada (20.4%  
35  
36 among 18–64-year-old men from the general population) <sup>23</sup>.  
37  
38  
39  
40  
41  
42  
43  
44  
45

46 In the present study, submariners more frequently experienced symptoms in the vascular,  
47  
48 respiratory, and endocrine CIRS domains, compared to non-submariners (Supplementary Table 1).  
49  
50 This finding is partially consistent with the findings of a previous study, which revealed that  
51  
52 respiratory infections and elevated blood pressure without a hypertension diagnosis were  
53  
54  
55  
56  
57  
58  
59  
60

1  
2  
3  
4 common morbidities among American submariners <sup>24</sup>. We assume that our findings may be  
5  
6  
7 related to the fact that current smoking and obesity are counted as respiratory and endocrine  
8  
9  
10 diseases, respectively, in the CIRS system <sup>16</sup>. When we excluded current smokers and obese  
11  
12  
13 subjects from each CIRS domain, a significant difference was observed in the endocrine domain ( $P$   
14  
15  $< 0.001$ ), although no significant difference was observed in the respiratory domain (data not  
16  
17  
18 shown).

19  
20  
21 Among both non-submariners and submariners, we observed positive associations between  
22  
23  
24 age and multi-morbidity, and this association has been clearly documented in previous studies <sup>6, 8,</sup>  
25  
26 <sup>22</sup>. In addition, our finding of increasing disease burden (estimated using CIRS) with age was  
27  
28  
29 similar to the findings from a Canadian study <sup>19</sup>. However, submariners had a greater prevalence  
30  
31  
32 of multi-morbidity and greater disease burden in all age groups, compared to non-submariners.  
33  
34  
35 Although the current smoking rate among submariners was comparable with that among the  
36  
37  
38 general population of Korean men (47% in 2012) <sup>25</sup>, the higher smoking rate among submariners  
39  
40  
41 may explain their greater disease burden, as current smoking is considered a respiratory problem  
42  
43  
44 in the CIRS system. In addition, the submariners' obesity rate was higher than that among Korean  
45  
46  
47 non-submariners, American small submarine crews (17.9% in 2011) <sup>26</sup>, and American police officers  
48  
49  
50 and firefighters (30.7% in 2002) <sup>27</sup>, which may also explain the difference in disease burden.  
51  
52  
53 Unfortunately, the confined submarine environment is not conducive to vigorous activity and  
54  
55  
56 exercise during deployment <sup>28</sup>, and submariners' caloric intake tends to exceed their expenditure  
57  
58  
59  
60

1  
2  
3  
4 during this time<sup>12</sup>. Thus, the combination of low physical activity levels and excessive caloric  
5  
6  
7 intake may elevate the risk of accumulating abdominal and visceral fat<sup>29</sup>, which could explain the  
8  
9  
10 prevalence of obesity among submariners. These factors may have contributed to the high disease  
11  
12  
13 burden and prevalence of multi-morbidity among submariners, compared to non-submariners.

14  
15 The present study also revealed that the duration of submarine service was positively  
16  
17  
18 associated with the prevalence of multi-morbidity. As age is strongly associated with multi-  
19  
20  
21 morbidity<sup>8,22</sup>, it may be possible that the association between multi-morbidity and service years  
22  
23  
24 was confounded by age. However, after adjusting for age, the positive association between service  
25  
26  
27 years and multi-morbidity was only slightly attenuated and remained statistically significant. Thus,  
28  
29  
30 our findings do not support a confounding effect of age on the association of service years with  
31  
32  
33 multi-morbidity.

34  
35 Submariners are exposed to several health risk factors, such as *Helicobacter pylori* infection  
36  
37  
38 related to overcrowding and extremely limited sanitary facilities<sup>30</sup>, increased cortisol levels related  
39  
40  
41 to chronic stress state and sleep deprivation<sup>31</sup>, and a high rate of smoking. These risks might  
42  
43  
44 have cumulative negative effects on submariners' health status, which might partially explain the  
45  
46  
47 higher prevalence of multi-morbidity in this population. Nevertheless, previous studies have  
48  
49  
50 reported conflicting findings regarding the health of submariners. For example, a study by the  
51  
52  
53 American Navy revealed that submarine duty did not increase the risk of hospitalization in 16  
54  
55  
56 major diagnostic categories and submarine-associated diagnoses (infective and parasitic diseases  
57  
58  
59  
60

1  
2  
3  
4 [tuberculosis, viral hepatitis, mononucleosis, venereal diseases], neoplasms, endocrine and  
5  
6  
7 nutritional diseases [diabetes mellitus], hematological diseases, mental disorders [alcohol abuse,  
8  
9  
10 drug abuse, schizophrenia, affective disorders, personality disorders], nervous system diseases,  
11  
12 cardiovascular diseases [essential hypertension, myocardial infarct, chronic ischemic heart disease],  
13  
14 respiratory diseases [acute upper respiratory infection, influenza, pneumonia, asthma], digestive  
15  
16 system diseases [dental diseases], genito-urinary diseases [kidney and ureteral stones], skin  
17  
18 diseases, musculoskeletal diseases, congenital anomalies, accidents and poisoning [fracture,  
19  
20  
21 concussion, sprain, contusion], and unspecified diseases and supplemental findings)<sup>32</sup>. However,  
22  
23  
24 we could not directly compare the findings of that study and our study, as we used different  
25  
26  
27 methods to identify morbidities (outpatient clinical records vs. hospitalization records and multi-  
28  
29  
30 morbidity vs. single disease entities).  
31  
32  
33

34  
35 Few studies have evaluated the risk of mortality among submariners, and those studies have  
36  
37 reported no significant association. A British study of Royal Naval submarine crews concluded that  
38  
39 working in a submarine was not associated with increased cancer mortality, although the authors  
40  
41 detected an increase in liver cirrhosis-related mortality that might not be attributable to the  
42  
43 submarine environment<sup>14</sup>. A Norwegian study also failed to detect differences in all-cause  
44  
45  
46 mortality among surface vessel and submarine crews, and the submariners had a lower rate of all-  
47  
48  
49 cause mortality, compared to the general population of Norwegian men<sup>13</sup>. Several explanations  
50  
51  
52 were proposed for the null finding from the Norwegian study. First, the participants had relatively  
53  
54  
55  
56  
57  
58  
59  
60



1  
2  
3  
4 low mean service times (2.7 years), which may have been insufficient to noticeably affect the  
5  
6  
7 subjects' mortality. Another plausible explanation is that morbidity may not significantly affect  
8  
9  
10 mortality in a relatively young and healthy population, unlike older populations<sup>3</sup>. Furthermore,  
11  
12 the "healthy soldier effect" may result in submariners having a good initial health state, as military  
13  
14 personnel and submariners are specially selected to perform challenging tasks, which could  
15  
16 diminish the adverse effects of the submarine working environment<sup>10</sup>.  
17  
18  
19

20  
21 There are several limitations in the present study. First, the cross-sectional design precludes any  
22  
23 conclusions regarding the causality of the relationship between submarine service and risk of  
24  
25 multi-morbidity. However, it seems logical to assume that submarine work increases multi-  
26  
27 morbidity, rather than vice versa, because it is very unlikely that multi-morbidity would drive an  
28  
29 individual to submarine work. Second, the absence of a standardized definition led us to create  
30  
31 our own arbitrary definition for multi-morbidity ( $\geq 2$  coexisting chronic conditions in a single  
32  
33 patient), and it is possible that we underestimated or overestimated the prevalence of multi-  
34  
35 morbidity. Third, the specificity of our study population (Korean submariners) would limit the  
36  
37 generalization of our findings to other populations.  
38  
39  
40  
41  
42  
43  
44

45  
46 In conclusion, this Korean study revealed that, compared to non-submarine service, submarine  
47  
48 service was significantly associated with a higher risk of multi-morbidity and greater disease  
49  
50 burden, even after adjusting for relevant covariates. These findings suggest that scrupulous  
51  
52 attention is needed to assess submariners and manage their health conditions in multi-  
53  
54  
55  
56  
57  
58  
59  
60

1  
2  
3  
4 dimensional and holistic ways. Further research is needed to examine the effects of multi-  
5  
6  
7 morbidity on disease patterns, quality of life, and overall mortality among submariners.  
8  
9  
10

11  
12 **Conflicts of interest:** None.  
13

14 **Acknowledgements:** None.  
15  
16

17 **Data sharing statement :** No additional data available  
18  
19

20 **Funding:** This study was supported by funding from the Armed Forces Medical Command, South  
21  
22 Korea.  
23  
24  
25  
26  
27  
28  
29  
30  
31  
32  
33  
34  
35  
36  
37  
38  
39  
40  
41  
42  
43  
44  
45  
46  
47  
48  
49  
50  
51  
52  
53  
54  
55  
56  
57  
58  
59  
60

## References

1. Glynn LG, Valderas JM, Healy P, et al. The prevalence of multimorbidity in primary care and its effect on health care utilization and cost. *Family practice*. 2011;28:516-523.
2. Fortin M, Bravo G, Hudon C, et al. Relationship between multimorbidity and health-related quality of life of patients in primary care. *Quality of Life Research*. 2006;15:83-91.
3. Menotti A, Mulder I, Nissinen A, Giampaoli S, Feskens EJ, Kromhout D. Prevalence of morbidity and multimorbidity in elderly male populations and their impact on 10-year all-cause mortality: The FINE study (Finland, Italy, Netherlands, Elderly). *Journal of clinical epidemiology*. 2001;54:680-686.
4. Organization WH. *World health statistics 2010*. World Health Organization; 2010.
5. van den Akker M, Buntinx F, Knottnerus JA. Comorbidity or multimorbidity: what's in a name? A review of literature. *The European Journal of General Practice*. 1996;2:65-70.
6. Marengoni A, Angleman S, Melis R, et al. Aging with multimorbidity: a systematic review of the literature. *Ageing research reviews*. 2011;10:430-439.
7. Taylor AW, Price K, Gill TK, et al. Multimorbidity-not just an older person's issue. Results from an Australian biomedical study. *BMC public health*. 2010;10:1.
8. Barnett K, Mercer SW, Norbury M, Watt G, Wyke S, Guthrie B. Epidemiology of multimorbidity and implications for health care, research, and medical education: a cross-sectional study. *The Lancet*. 2012;380:37-43.
9. Prados-Torres A, Poblador-Plou B, Calderón-Larrañaga A, et al. Multimorbidity patterns in primary care: interactions among chronic diseases using factor analysis. *PloS one*. 2012;7:e32190.
10. McLaughlin R, Nielsen L, Waller M. An evaluation of the effect of military service on mortality: quantifying the healthy soldier effect. *Ann Epidemiol*. 2008;18:928-936.
11. Brasher KS, Dew AB, Kilminster SG, Bridger RS. Occupational stress in submariners: the impact of isolated and confined work on psychological well-being. *Ergonomics*. 2010;53:305-313.
12. Hartwell J, Durocher N, Gertner J, Vanderweele J, Marvin K, Horn W. A comparison of the prevalence of metabolic syndrome among fast-attack submariners with us civilian males. 2009.
13. Strand LA, Martinsen JI, Koefoed VF, Sommerfelt-Pettersen J, Grimsrud TK. Cause-specific mortality and cancer incidence among 28 300 Royal Norwegian Navy servicemen followed for more than 50 years. *Scandinavian journal of work, environment & health*. 2011:307-315.
14. Inskip H, Snee M, Styles L. The mortality of Royal Naval submariners 1960-89. *Occupational and environmental medicine*. 1997;54:209-215.
15. Oh SW. Obesity and metabolic syndrome in Korea. *Diabetes & metabolism journal*.

- 2011;35:561-566.
16. Hudon C, Fortin M, Soubhi H. Abbreviated guidelines for scoring the Cumulative Illness Rating Scale (CIRS) in family practice. *Journal of clinical epidemiology*. 2007;60:212. e211-212. e214.
  17. Linn BS, LINN MW, Gurel L. Cumulative illness rating scale. *Journal of the American Geriatrics Society*. 1968;16:622-626.
  18. Miller MD, Paradis CF, Houck PR, et al. Rating chronic medical illness burden in geropsychiatric practice and research: application of the Cumulative Illness Rating Scale. *Psychiatry research*. 1992;41:237-248.
  19. Fortin M, Bravo G, Hudon C, Vanasse A, Lapointe L. Prevalence of multimorbidity among adults seen in family practice. *The Annals of Family Medicine*. 2005;3:223-228.
  20. Hudon C, Fortin M, Vanasse A. Cumulative Illness Rating Scale was a reliable and valid index in a family practice context. *Journal of clinical epidemiology*. 2005;58:603-608.
  21. Harrison C, Britt H, Miller G, Henderson J. Examining different measures of multimorbidity, using a large prospective cross-sectional study in Australian general practice. *BMJ open*. 2014;4:e004694.
  22. van den Akker M, Buntinx F, Metsemakers JFM, Roos S, Knottnerus JA. Multimorbidity in General Practice: Prevalence, Incidence, and Determinants of Co-Occurring Chronic and Recurrent Diseases. *Journal of Clinical Epidemiology*. 1998;51:367-375.
  23. Agborsangaya CB, Lau D, Lahtinen M, Cooke T, Johnson JA. Multimorbidity prevalence and patterns across socioeconomic determinants: a cross-sectional survey. *BMC public health*. 2012;12:1.
  24. Jan M, Thomas T, Hooper T. Prescription medication use aboard US submarines during periods underway. 2002.
  25. Jee SH, Samet JM, Ohrr H, Kim JH, Kim IS. Smoking and cancer risk in Korean men and women. *Cancer Causes & Control*. 2004;15:341-348.
  26. Gregg MA, Jankosky CJ. Physical readiness and obesity among male US Navy personnel with limited exercise availability while at sea. *Military medicine*. 2012;177:1302-1307.
  27. Caban AJ, Lee DJ, Fleming LE, Gómez-Marín O, LeBlanc W, Pitman T. Obesity in US Workers: The National Health Interview Survey, 1986 to 2002. *Am J Public Health*. 2005;95:1614-1622.
  28. Choi S-W, Lee J-H, Jang Y-K, Kim J-R. Assessment of ambulatory activity in the Republic of Korea Navy submarine crew. *Undersea & Hyperbaric Medicine*. 2010;37:413.
  29. Ross R, Janssen I. Physical activity, total and regional obesity: dose-response considerations. *Medicine and science in sports and exercise*. 2001;33:S521-527; discussion S528-529.
  30. Hammermeister I, Janus G, Schamarowski F, Rudolf M, Jacobs E, Kist M. Elevated risk of *Helicobacter pylori* infection in submarine crews. *European Journal of Clinical*

- 1  
2  
3  
4 *Microbiology and Infectious Diseases*. 1992;11:9-14.  
5  
6 31. Reini SA. Hypercortisolism as a potential concern for submariners. *Aviation, space, and*  
7 *environmental medicine*. 2010;81:1114-1122.  
8  
9 32. Burr RG, Palinkas LA. Health risks among submarine personnel in the US Navy, 1974-1979.  
10 DTIC Document; 1986.  
11  
12  
13  
14  
15  
16  
17  
18  
19  
20  
21  
22  
23  
24  
25  
26  
27  
28  
29  
30  
31  
32  
33  
34  
35  
36  
37  
38  
39  
40  
41  
42  
43  
44  
45  
46  
47  
48  
49  
50  
51  
52  
53  
54  
55  
56  
57  
58  
59  
60

For peer review only

Table 1. General and clinical characteristics of study subjects

|                                                | Overall<br>(N=590) | Non-submariner<br>(N=180) | Submariner<br>(N=410) | P-value* |
|------------------------------------------------|--------------------|---------------------------|-----------------------|----------|
| Age, years, mean (SD)                          | 33.2(8.5)          | 31.2(9.9)                 | 34.1(7.7)             | <0.001   |
| Height, cm                                     | 173.8(0.1)         | 173.4(0.1)                | 174.0(0.1)            | 0.189    |
| Body mass index, kg/m <sup>2</sup> , mean (SD) | 25.0(3.0)          | 24.3(3.0)                 | 25.3(2.9)             | <0.001   |
| ≥25 kg/m <sup>2</sup> , N(%)                   | 267(45.3)          | 63(35.0)                  | 204(49.8)             | 0.001    |
| 18.5-24.9 kg/m <sup>2</sup> , N(%)             | 322(54.6)          | 116(64.4)                 | 206(50.2)             |          |
| <18.5 kg/m <sup>2</sup> , N(%)                 | 1(0.2)             | 1(0.6)                    | 0(0)                  |          |
| Alcohol consumption, N(%)                      | 487(82.5)          | 152(84.4)                 | 335(81.7)             | 0.420    |
| Current smoker, N(%)                           | 277(46.9)          | 68(37.8)                  | 209(51.0)             | 0.003    |
| Job-Ranking, N(%)                              |                    |                           |                       | <0001    |
| Officer                                        | 103(17.5)          | 31(17.2)                  | 72(17.6)              |          |
| Petty officer                                  | 465(78.8)          | 127(70.6)                 | 338(82.4)             |          |
| Others                                         | 22(3.7)            | 22(12.2)                  | 0(0%)                 |          |
| Mean (SD) years of service in submarine        | NA                 | 0                         | 7.1(5.3)              | NA       |

N: number of subjects, SD: standard deviation, NA: not applicable

\* P-value was obtained by t test for continuous variables and chi-square test for categorical variable

Table 2. Comparison of the number of chronic health problems and mean Cumulative Illness Rating Scale score between submariners and non-submariners by age group

|                                                     | Overall        |            |          | <30 years      |            |          | 30-39 years    |            |          | ≥40 years      |            |          |
|-----------------------------------------------------|----------------|------------|----------|----------------|------------|----------|----------------|------------|----------|----------------|------------|----------|
|                                                     | Non-submariner | Submariner | P-value* |
| Chronic health problems, N (%)                      |                |            |          |                |            |          |                |            |          |                |            |          |
| 0                                                   | 96(53.3)       | 126(30.7)  | <0.001   | 62(61.4)       | 56(44.8)   | 0.009    | 17(51.5)       | 52(27.8)   | 0.012    | 17(37.0)       | 18(18.4)   | 0.005    |
| 1                                                   | 63(35.0)       | 152(37.1)  |          | 33(32.7)       | 47(37.6)   |          | 12(36.4)       | 75(40.1)   |          | 18(39.1)       | 30(30.6)   |          |
| 2                                                   | 21(11.7)       | 132(32.2)  |          | 6(5.9)         | 22(17.6)   |          | 4(12.1)        | 60(32.1)   |          | 11(23.9)       | 50(51.0)   |          |
| Cumulative Illness Rating Scale score, mean(SD)     |                |            |          |                |            |          |                |            |          |                |            |          |
|                                                     | 1.66(1.16)     | 2.35(1.51) | <0.001   | 1.31(1.03)     | 1.70(1.23) | 0.010    | 1.64(1.0)      | 2.33(1.43) | 0.008    | 2.43(1.21)     | 3.23(1.59) | 0.003    |
| N: number, SD: standard deviation                   |                |            |          |                |            |          |                |            |          |                |            |          |
| * P-value was obtained by chi-square test or t-test |                |            |          |                |            |          |                |            |          |                |            |          |

Table 3. Association of submarine service with the risk of multi-morbidity<sup>†</sup> and high disease burden<sup>‡</sup>

|                                                                                                                         | Years of submarine service |                      |                      |                      | P <sub>trend</sub> <sup>¶</sup> |
|-------------------------------------------------------------------------------------------------------------------------|----------------------------|----------------------|----------------------|----------------------|---------------------------------|
|                                                                                                                         | 0 year<br>(N=180)          | 1-4 years<br>(N=158) | 5-9 years<br>(N=107) | ≥10 years<br>(N=145) |                                 |
| OR (95% CI)* for the association with multi-morbidity <sup>†</sup>                                                      |                            |                      |                      |                      |                                 |
| Model 1                                                                                                                 | 1                          | 3.46(1.75-6.87)      | 2.59(1.37-4.89)      | 3.97(2.19-7.19)      | <0.001                          |
| Model 2                                                                                                                 | 1                          | 3.97(1.91-8.25)      | 2.75(1.41-5.38)      | 3.78(2.06-6.94)      | <0.001                          |
| OR (95% CI)* for the association with the high disease burden <sup>‡</sup> estimated by Cumulative Illness Rating Scale |                            |                      |                      |                      |                                 |
| Model 1                                                                                                                 | 1                          | 1.86(1.04-3.32)      | 2.36(1.37-4.05)      | 2.77(1.63-4.71)      | 0.001                           |
| Model 2                                                                                                                 | 1                          | 2.00(1.09-3.67)      | 2.23(1.24-4.01)      | 1.97(1.09-3.57)      | 0.028                           |

OR (95% CI): odds ratio (95% confidence interval)

\* estimated by multiple logistic regression analysis. In model 1, age was adjusted. In model 2, age, alcohol intake, smoking status (not included in the analysis for the disease burden), and job-ranking were adjusted.

<sup>†</sup> defined as two or more chronic health problems in a person

<sup>‡</sup> defined as Cumulative Illness Rating Scale score  $\geq 3$  <sup>¶</sup> assessed by linear regression analysis, for which year of service was put in the model as a continuous variable.



1  
2  
3  
4  
5  
6  
7  
8  
9  
10  
11  
12  
13  
14  
15  
16  
17  
18  
19  
20  
21  
22  
23  
24  
25  
26  
27  
28  
29  
30  
31  
32  
33  
34  
35  
36  
37  
38  
39  
40  
41  
42  
43  
44  
45  
46  
47  
48  
49

For peer review only

1  
2  
3  
4  
5  
6  
7  
8  
9  
10  
11  
12  
13  
14  
15  
16  
17  
18  
19  
20  
21  
22  
23  
24  
25  
26  
27  
28  
29  
30  
31  
32  
33  
34  
35  
36  
37  
38  
39  
40  
41  
42  
43  
44  
45  
46  
47  
48  
49

For peer review only

1  
2  
3  
4  
5  
6  
7  
8  
9  
10  
11  
12  
13  
14  
15  
16  
17  
18  
19  
20  
21  
22  
23  
24  
25  
26  
27  
28  
29  
30  
31  
32  
33  
34  
35  
36  
37  
38  
39  
40  
41  
42  
43  
44  
45  
46  
47  
48  
49

Supplementary Table 1. Distribution of symptoms in each organ domain of Cumulative Illness Rating Scale

| Organ domains                 | Non-submariner<br>N(%) | Submariner<br>N(%) | P-value* |
|-------------------------------|------------------------|--------------------|----------|
| Overall                       | 84(46.7)               | 284(69.3)          | <0.001   |
| Cardiac                       | 2(1.1)                 | 4(1.0)             | 0.880    |
| Vascular                      | 21(11.7)               | 125(30.5)          | <0.001   |
| Respiratory                   | 74(41.1)               | 239(58.3)          | <0.001   |
| Eyes ear, nose, and throat    | 53(29.4)               | 85(20.7)           | 0.021    |
| Upper gastrointestinal tract  | 5(2.8)                 | 8(2.0)             | 0.529    |
| Lower gastrointestinal tract  | 9(5.0)                 | 12(2.9)            | 0.211    |
| Musculoskeletal or tegumental | 34(18.9)               | 96(23.4)           | 0.222    |
| Neurological                  | 5(2.8)                 | 11(2.7)            | 0.948    |
| Endocrine, metabolic, breast  | 63(35.0)               | 211(51.5)          | <0.001   |
| Other organ                   | 4(2.2)                 | 19(4.6)            | 0.163    |

N: number, SD: standard deviation

\* P-value was obtained by chi-square test or t-test

# BMJ Open

## The association between submarine service and multi-morbidity: a cross-sectional study in Korean naval personnel

|                                 |                                                                                                                                                                                           |
|---------------------------------|-------------------------------------------------------------------------------------------------------------------------------------------------------------------------------------------|
| Journal:                        | <i>BMJ Open</i>                                                                                                                                                                           |
| Manuscript ID                   | bmjopen-2017-017776.R1                                                                                                                                                                    |
| Article Type:                   | Research                                                                                                                                                                                  |
| Date Submitted by the Author:   | 13-Jul-2017                                                                                                                                                                               |
| Complete List of Authors:       | Kang, Jihun; Kosin University Gospel Hospital, Kosin University College of Medicine, Department of Family Medicine<br>Song, Yun-Mi; Samsung Medical Center, Department of Family Medicine |
| <b>Primary Subject Heading</b>: | Epidemiology                                                                                                                                                                              |
| Secondary Subject Heading:      | General practice / Family practice                                                                                                                                                        |
| Keywords:                       | submarine, multimorbidity, disease burden, occupational exposure                                                                                                                          |
|                                 |                                                                                                                                                                                           |

SCHOLARONE™  
Manuscripts

only

1  
2  
3  
4 **The association between submarine service and multi-morbidity: a cross-sectional study in**  
5  
6

7 **Korean naval personnel**  
8

9  
10 Jihun Kang, MD, MS<sup>1</sup> and Yun-Mi Song, MD, MPH, PhD<sup>2</sup>  
11

12  
13  
14  
15 <sup>1</sup> Department of Family Medicine, Kosin University Gospel Hospital, Kosin University College of  
16  
17  
18 Medicine, Busan, Republic of Korea  
19

20  
21 <sup>2</sup> Department of Family Medicine, Samsung Medical Center, Sungkyunkwan University School of  
22  
23  
24 Medicine, Seoul, Republic of Korea  
25

26  
27  
28  
29 **Corresponding author:**  
30

31  
32 Yun-Mi Song, MD, MPH, PhD  
33

34  
35 Department of Family Medicine, Samsung Medical Center, Sungkyunkwan University School of  
36  
37  
38 Medicine, 81 Irwon-ro, Gangnam-gu, Seoul 135-710, Republic of Korea  
39

40  
41 Tel: +82-2-3410-2442; Fax: +82-2-3410-0388; Email: [yunmisong@skku.edu](mailto:yunmisong@skku.edu)  
42  
43  
44  
45

46 **Contributorship statements**  
47

48  
49 Dr. Jihun Kang (1<sup>st</sup> author) conceived of and designed the study; collected, analyzed, and  
50  
51  
52 interpreted the data; and wrote and revised the report. Prof. Yun-Mi Song (corresponding author)  
53  
54  
55 conceived of and designed the study; collected, analyzed, and interpreted the data; and provided  
56  
57  
58  
59  
60

1  
2  
3  
4 important intellectual context and critical revisions for the report. Both authors have approved the  
5  
6  
7 final version for publication, and accepted responsibility for the accuracy and integrity of the data  
8  
9  
10 and the analysis.  
11  
12  
13  
14  
15  
16  
17  
18  
19  
20  
21  
22  
23  
24  
25  
26  
27  
28  
29  
30  
31  
32  
33  
34  
35  
36  
37  
38  
39  
40  
41  
42  
43  
44  
45  
46  
47  
48  
49  
50  
51  
52  
53  
54  
55  
56  
57  
58  
59  
60

For peer review only

**ABSTRACT**

*Objective:* We aimed to estimate the prevalence of multi-morbidity ( $\geq 2$  chronic health problems) among Korean submariners, and to evaluate the associations of submarine service with multi-morbidity and disease burden.

*Study Design and Setting:* This cross-sectional study included 590 naval personnel who visited a Korean primary care clinic during 2014–2015. Data regarding general characteristics and morbidities were collected from medical records, and disease burden was assessed using the Cumulative Illness Rating Scale (CIRS). Multiple logistic regression analysis was used to evaluate the associations of submarine service with multi-morbidity and disease burden.

*Results:* The prevalence of multi-morbidity was 11.7% among 180 non-submariners and 32.2% among 410 submariners. The prevalence of multi-morbidity and the CIRS scores gradually increased with age. Significant positive age-adjusted associations were observed between the overall years of submarine service and multi-morbidity or high disease burden (a CIRS score of  $\geq 3$ ) (P for trend < 0.001). These associations remained significant after adjusting for age, alcohol consumption, smoking status, and naval rank.

*Conclusions:* Submarine service was significantly associated with a higher risk of multi-morbidity and greater disease burden, compared to non-submarine service. This finding suggests that multi-dimensional and holistic healthcare approaches are needed for submariners.

**Keywords:** Submarine, multi-morbidity, disease burden, occupational exposure

1  
2  
3  
4  
5  
6  
7  
8  
9  
10 **Strengths and limitations of this study**

11  
12 Multi-morbidity as well as disease burden of submariners were evaluated.

13  
14  
15 The cross-sectional design precludes any conclusions regarding the direction of causality in the  
16  
17 relationship between submarine service and multi-morbidity.  
18

19  
20 The specificity of our study population, Korean submariners, limits the generalization of our  
21  
22 findings to other populations.  
23  
24  
25  
26  
27  
28  
29  
30  
31  
32  
33  
34  
35  
36  
37  
38  
39  
40  
41  
42  
43  
44  
45  
46  
47  
48  
49  
50  
51  
52  
53  
54  
55  
56  
57  
58  
59  
60



## INTRODUCTION

Multi-morbidity (the coexistence of  $\geq 2$  long-term diseases or medical conditions in one person) is associated with increased medical expenditures<sup>1</sup>, decreased quality of life<sup>2</sup>, and higher mortality<sup>3</sup>. With increasing life expectancy and population aging<sup>4</sup>, multi-morbidity has become an important public health issue<sup>5</sup>, because elderly people are likely to have multiple coexisting medical conditions. Therefore, most multi-morbidity research has been performed among older populations<sup>3,6</sup>, although multi-morbidity is not just an issue for elderly people<sup>7</sup>. A recent study found that >50% of people with multiple medical conditions were <65 years old<sup>8</sup>, which implies that multi-morbidity should be investigated in a broader age range<sup>9</sup>.

Military personnel are often relatively young people who perform physical training, military drilling, and deployment. Among military personnel, submariners are a unique population because they complete a specialized selection process and training to ensure that they can perform their demanding duties. Thus, submariners are considered a relatively healthy group at the time of their recruitment<sup>10</sup>. However, submariners are concurrently exposed to various environmental risk factors that can affect their health status, such as their confined work environment, physical inactivity, excessive caloric intake, circadian disruption, and isolation from family during deployment<sup>11-13</sup>. Few studies of submariners have evaluated the effects of these occupational risk factors on submariners' health status with controversial findings. A Norwegian study revealed that submariners had increased risks of bladder cancer and non-melanoma skin cancer<sup>14</sup>. Similarly, a

1  
2  
3  
4 German study revealed that submariners had a higher rate of *Helicobacter pylori* infection,  
5  
6  
7 compared to other naval personnel <sup>15</sup>. On the other hand,, a British study revealed that submarine  
8  
9  
10 service was not associated with increased risks of mortality or specific diseases <sup>16</sup>. Moreover, little  
11  
12  
13 is known whether submarine service is associated with multi-morbidity. Therefore, the present  
14  
15  
16 study aimed to estimate the prevalence of multi-morbidity among Korean submariners, and to  
17  
18  
19 evaluate the associations of submarine service with multi-morbidity and disease burden by  
20  
21  
22 comparing submariners and non-submarine naval personnel.  
23  
24  
25

## 26 **METHODS AND MATERIALS**

### 27 *Study design and participants*

28  
29  
30  
31  
32 This cross-sectional study analyzed data from the medical records of naval personnel who  
33  
34  
35 visited a primary care facility at the military base in Jinhae (Republic of Korea) between April 2014  
36  
37  
38 and March 2015. Among the 1,004 male individuals who visited the clinic, we excluded 332  
39  
40  
41 persons who had a temporary service commission (conscripted individuals who were not eligible  
42  
43  
44 for submariner service) and 82 persons with missing information regarding their socio-  
45  
46  
47 demographic characteristics (N = 15) or disease status (N = 67). Thus, 590 permanently  
48  
49  
50 commissioned naval personnel who volunteered for professional naval service were ultimately  
51  
52  
53 included in the present study. We defined submariners as person who completed submarine  
54  
55  
56 training courses and worked in a submarine for  $\geq 6$  months, and categorized the subjects as either  
57  
58  
59  
60

1  
2  
3  
4 submariners (410 persons) or non-submariners (180 persons).  
5  
6

7 The study's protocol complied with the STROBE guidelines. In addition, the protocol was  
8  
9 approved and the requirement of informed consent was waived, by the institutional review board  
10  
11 of the Armed Forces Medical Command in Seongnam, South Korea (AFMC-15088-IRB-15-068).  
12  
13

#### 14 *Data collection*

15  
16 The subjects' socio-demographic data (age, years of submarine service, and naval rank),  
17  
18 anthropometric data (height and weight), and health behaviors (smoking status and alcohol  
19  
20 consumption) were obtained by reviewing their medical records. Current smokers were defined  
21  
22 individuals who had smoked >100 cigarettes during their life and were currently smoking. Self-  
23  
24 reporting was used to identify individuals who consumed alcohol. Body mass indexes (BMI, kg/m<sup>2</sup>)  
25  
26 were calculated as weight divided by height squared, and we defined obesity as a BMI of ≥25  
27  
28 kg/m<sup>2</sup>, based on the definition for the Korean population <sup>17</sup>.  
29  
30  
31  
32  
33  
34  
35  
36

37 We identified co-existing chronic health problems in several ways. First, we asked the study  
38  
39 subjects to answer "yes" or "no" to each question regarding whether they had experienced or had  
40  
41 received treatment for the chronic conditions such as such as diabetes, chronic obstructive  
42  
43 pulmonary disorder, asthma, hypertension, dyslipidemia, heart disease (congestive heart failure  
44  
45 and ischemic heart disease), stroke, gastro-esophageal reflux, sleep apnea, arthritis, kidney disease,  
46  
47 or psychological disorders, using a self-administered questionnaire. Then, an additional physician-  
48  
49 led examination was followed to identify any unreported conditions. In addition, we reviewed  
50  
51  
52  
53  
54  
55  
56  
57  
58  
59  
60

1  
2  
3  
4 medical record of each study subjects. Because an electronic medical record system was  
5  
6  
7 implemented in 2013, we reviewed the medical records as far as that point and data extraction  
8  
9  
10 from the subjects' medical records was performed using disease codes from the 10<sup>th</sup> revision of  
11  
12 the International Classification of Disease. The presence of multi-morbidity ( $\geq 2$  chronic medical  
13  
14 conditions) was evaluated by counting the number of chronic health conditions that each subject  
15  
16  
17 had.  
18  
19

20  
21 We estimated disease burdens based on the illnesses and their severities using the Cumulative  
22  
23 Illness Rating Scale (CIRS) <sup>18</sup>. This tool assesses symptoms in 14 organ domains (cardiac; vascular;  
24  
25 hematological; respiratory; eyes, ear, nose, and throat; upper gastrointestinal tract; lower  
26  
27 gastrointestinal tract; hepatic and pancreatic; renal; genitourinary; musculoskeletal and tegumental;  
28  
29 gastrointestinal tract; hepatic and pancreatic; renal; genitourinary; musculoskeletal and tegumental;  
30  
31 neurological; endocrine, metabolic, breast; and psychiatric). The CIRS was originally developed by  
32  
33 Linn et al. <sup>19</sup> to assess chronic medical problems in a comprehensive manner, and was  
34  
35 subsequently revised by Miller et al. <sup>20</sup> to measure common morbidities among elderly patients.  
36  
37  
38 This tool was later modified by Hudon et al. <sup>18</sup> to estimate multi-morbidity in the primary care  
39  
40 setting, and was found to be a reliable and valid tool <sup>21 22</sup>. The CIRS score for each organ system  
41  
42 ranges from 0 (no problems affecting that system) to 4 (extremely severe problems), and the total  
43  
44 CIRS score is calculated by adding the scores for all 14 organ domains (range: 0–56). If a person  
45  
46 currently smokes or has a high BMI ( $\geq 25$  kg/m<sup>2</sup>), then the person is considered to have disease  
47  
48 burden in the respiratory and metabolic systems, respectively. The total CIRS score has a left-  
49  
50  
51  
52  
53  
54  
55  
56  
57  
58  
59  
60

1  
2  
3  
4 skewed distribution because it is very rare for a person to have severe medical conditions in every  
5  
6  
7 organ system.

### 8 9 10 *Statistical analyses*

11  
12 The demographic characteristics, distributions of chronic health problems, and CIRS scores  
13  
14 were compared between submariners and non-submariners using the chi-square test and t test,  
15  
16 as appropriate. We also compared the distributions of chronic health problems and CIRS scores  
17  
18 for three age strata (<30 years, 30–39 years, and ≥40 years) because the age distributions were  
19  
20 significantly different between the submariners and non-submariners. There is no standardized  
21  
22 cut-off value for high disease burden based on CIRS score, and we arbitrarily defined subjects in  
23  
24 the upper tertile of CIRS scores (≥3) as having high disease burden. We also evaluated the  
25  
26 associations of submarine service with multi-morbidity and high disease burden using multiple  
27  
28 logistic regression analysis after adjusting for age, alcohol consumption, smoking status, and naval  
29  
30 rank (reference group: non-submariners with 0 years of submarine service). However, we did not  
31  
32 include smoking status as a covariate in the model for disease burden, because it is a component  
33  
34 of the CIRS score. All statistical analyses were performed using PASW Statistics software (version  
35  
36 21.0; SPSS Inc., Chicago, IL, USA). Two-tailed P-values of <0.05 were considered statistically  
37  
38 significant.  
39  
40  
41  
42  
43  
44  
45  
46  
47  
48  
49  
50  
51  
52  
53  
54

## 55 **RESULTS**

1  
2  
3  
4 Table 1 shows the subjects' characteristics. Compared to non-submariners, submariners were  
5  
6 significantly older, were more likely to be a current smoker and obese, and had a higher naval  
7  
8 rank ( $p < 0.05$ ). Table 2 shows the distributions of chronic health problems and CIRS scores  
9  
10 among all subjects and in the three age strata. The prevalence of multi-morbidity were 11.7%  
11  
12 among non-submariners and 32.2% among submariners. The prevalence of multi-morbidity and  
13  
14 the CIRS scores gradually increased with age among both submariners and non-submariners. The  
15  
16 number of chronic health problems and CIRS scores were significantly higher among submariners,  
17  
18 compared to those among non-submariners, across all age groups.  
19  
20  
21  
22  
23  
24

25  
26 Table 3 shows the adjusted associations of submarine service with the risks of multi-morbidity  
27  
28 and high disease burden (CIRS of  $\geq 3$ ). Submarine service of one-year or longer was positively  
29  
30 associated with multi-morbidity and disease burden as compared with less than one-year of  
31  
32 submarine service. This association remained significant after adjusting for age, alcohol  
33  
34 consumption, smoking status, and naval rank. However, a dose-response relationship according to  
35  
36 submarine service duration was not evident (Supplementary Table 1).  
37  
38  
39  
40  
41  
42

43  
44 Supplementary Table 2 shows the prevalence of symptoms in each CIRS organ domain.  
45  
46 Compared to non-submariners, submariners more frequently experienced symptoms in the  
47  
48 vascular, respiratory, ear/nose/throat, and endocrine domains. Both groups had similar prevalences  
49  
50 of symptoms in the cardiac, upper and lower gastrointestinal, musculoskeletal or tegumental, and  
51  
52 neurological domains. When we excluded current smokers and obese subjects from the CIRS  
53  
54  
55  
56  
57  
58  
59  
60

1  
2  
3  
4 domain analyses, no significant difference was observed in the endocrine and respiratory domain.  
5  
6  
7  
8

## 9 10 **DISCUSSION**

11  
12 The present study is the first to examine the prevalence of multi-morbidity and disease burden  
13 among submariners. Use of the CIRS score allowed us to provide more comprehensive data,  
14 especially regarding the disease burden, compared to previous studies <sup>3 8 23</sup>. Based on our findings,  
15 approximately 30% of submariners had multi-morbidity, and this rate was approximately 3 times  
16 greater than the prevalence among non-submariner naval personnel (11.7%). The higher rate of  
17 multi-morbidity among submariners was consistently observed in different age strata, which  
18 suggests that the significant difference in the multi-morbidity rate was not caused by different  
19 age distributions.  
20  
21  
22  
23  
24  
25  
26  
27  
28  
29  
30  
31  
32  
33  
34

35 A previous study in primary care setting has shown that multi-morbidity prevalence might be  
36 comparable between studies when multi-morbidity is defined as  $\geq 2$  disease entities, regardless of  
37 the specific disease entity definitions in each study <sup>24</sup>. The prevalence of multi-morbidity varies  
38 according to study. After excluding elderly subjects (to simplify the age-based comparisons), we  
39 found that the prevalence of multi-morbidity among non-submariners was 11.7%, which was  
40 lower than the reported prevalence in the Netherlands (24.2% among 20–59-year-old men from  
41 the general population) <sup>23</sup>, Scotland (20.5% among 25–65-year-old men from the general  
42 population) <sup>8</sup>, and Canada (20.4% among 18–64-year-old men from the general population) <sup>25</sup>.  
43  
44  
45  
46  
47  
48  
49  
50  
51  
52  
53  
54  
55  
56  
57  
58  
59  
60

1  
2  
3  
4 However, the difference in the prevalence of multi-morbidity across studies might have been  
5  
6  
7 causes from the varying definitions and methods for assessing multi-morbidity, and study setting.  
8  
9

10 In the present study, submariners more frequently experienced symptoms in the vascular,  
11  
12 respiratory, endocrine, and ear/nose/throat CIRS domains, compared to non-submariners  
13  
14 (Supplementary Table 2). This finding is partially consistent with the findings of a previous study,  
15  
16 which revealed that respiratory infections and elevated blood pressure without a hypertension  
17  
18 diagnosis were common morbidities among American submariners <sup>26</sup>. We assume that our  
19  
20 findings may be related to the fact that current smoking and obesity are counted as respiratory  
21  
22 and endocrine diseases, respectively, in the CIRS system <sup>18</sup>. Although smoking rate was lower in  
23  
24 submariners than in non-submariners, worse air quality from enclosed space of submarine might  
25  
26 have contributed to the more prevalent respiratory and ear/nose/throat symptoms.  
27  
28  
29  
30  
31  
32  
33  
34

35 We observed positive associations between age and multi-morbidity among both non-  
36  
37 submariners and submariners, and this association has been clearly documented in previous  
38  
39 studies <sup>6 8 23</sup>. In addition, our finding of increasing disease burden (estimated using CIRS) with age  
40  
41 was similar to the findings from a Canadian study <sup>21</sup>. However, submariners had a greater  
42  
43 prevalence of multi-morbidity and greater disease burden in all age groups, compared to non-  
44  
45 submariners. Although the current smoking rate among submariners was comparable to that  
46  
47 among the general population of Korean men (47% in 2012) <sup>27</sup>, the higher smoking rate among  
48  
49 submariners may explain their greater disease burden, as current smoking is considered a  
50  
51  
52  
53  
54  
55  
56  
57  
58  
59  
60



1  
2  
3  
4 respiratory problem in the CIRS system. In addition, the submariners' obesity rate was higher than  
5  
6  
7 that among Korean non-submariners, American small submarine crews (17.9% in 2011)<sup>28</sup>, and  
8  
9  
10 American police officers and firefighters (30.7% in 2002)<sup>29</sup>, which may also explain the difference  
11  
12  
13 in disease burden. Although different cut-off values for obesity are used for Korean and American  
14  
15 populations ( $\geq 25$  kg/m<sup>2</sup> vs.  $\geq 30$  kg/m<sup>2</sup>), we think the results are comparable in terms of obesity  
16  
17  
18 diagnoses because Asian populations have a higher body fat composition for any given BMI,  
19  
20  
21 compared to Caucasian populations<sup>30</sup> and increased all-cause mortality is associated with BMI of  
22  
23  
24  $\geq 25$  kg/m<sup>2</sup> in the Korean population<sup>31</sup>.

25  
26  
27 Unfortunately, the confined submarine environment is not conducive to vigorous activity and  
28  
29  
30 exercise during deployment<sup>32</sup>, and submariners' caloric intake tends to exceed their expenditure  
31  
32  
33 during this time<sup>12</sup>. Moreover, submariners' shift work schedules during their deployment may  
34  
35  
36 increase their risk of metabolic syndrome<sup>33</sup>. Thus, the combination of low physical activity levels,  
37  
38  
39 excessive caloric intake, and circadian misalignment may elevate the risk of accumulating  
40  
41  
42 abdominal and visceral fat<sup>34</sup>, which could explain the prevalence of obesity among submariners.  
43  
44  
45 These factors may also have contributed to the high disease burden and prevalence of multi-  
46  
47  
48 morbidity among submariners, compared to non-submariners.

49  
50  
51 As age is strongly associated with multi-morbidity<sup>8 23</sup>, it is possible that the association  
52  
53  
54 between multi-morbidity and service years was confounded by age. However, after adjusting for  
55  
56  
57 age, the positive associations of submarine service with multi-morbidity as well as disease burden  
58  
59  
60

1  
2  
3  
4 were only slightly attenuated. Thus, our findings negate a significant confounding effect of age on  
5  
6  
7 the association.

8  
9  
10 Submariners are exposed to several health risk factors, such as *Helicobacter pylori* infection,  
11  
12 that are related to overcrowding and extremely limited sanitary facilities <sup>15</sup>, increased cortisol  
13  
14 levels related to chronic stress state and sleep deprivation <sup>35</sup>, and low air quality in an enclosed  
15  
16 space <sup>36</sup>. These risk factors may have cumulative negative effects on submariners' health status,  
17  
18 which might partially explain the higher prevalence of multi-morbidity in this population.  
19  
20  
21 Nevertheless, previous studies have reported conflicting findings regarding the health of  
22  
23  
24 submariners. For example, a study by the American Navy revealed that submarine duty did not  
25  
26 increase the risk of hospitalization for 16 major diagnostic categories and submarine-associated  
27  
28 diagnoses <sup>37</sup>. However, we could not directly compare the findings of that study and our study, as  
29  
30  
31 we used different methods to identify morbidities (outpatient clinical records vs. hospitalization  
32  
33 records and multi-morbidity vs. single disease entities).  
34  
35  
36  
37  
38  
39

40  
41 Few studies have evaluated the risk of mortality among submariners, and those studies have  
42  
43 reported no significant association. A British study of Royal Navy submarine crews concluded that  
44  
45 working in a submarine was not associated with increased cancer mortality, although the authors  
46  
47 detected an increase in liver cirrhosis-related mortality that might not be attributable to the  
48  
49 submarine environment <sup>16</sup>. A Norwegian study also failed to detect differences in all-cause  
50  
51 mortality among surface vessel and submarine crews, and the submariners had a lower rate of all-  
52  
53  
54  
55  
56  
57  
58  
59  
60

1  
2  
3  
4 cause mortality, compared to the general population of Norwegian men <sup>14</sup>. Several explanations  
5  
6  
7 were proposed for the null finding from the Norwegian study. First, the participants had relatively  
8  
9  
10 low mean service times (2.7 years), which may have been insufficient to noticeably affect the  
11  
12  
13 subjects' mortality. Another plausible explanation is that morbidity may not significantly affect  
14  
15  
16 mortality in a relatively young and healthy population, unlike older populations <sup>3</sup>. Furthermore,  
17  
18 the "healthy soldier effect" may result in submariners having a good initial health state, as military  
19  
20  
21 personnel and submariners are specially selected to perform challenging tasks, which could  
22  
23  
24 diminish the adverse effects of the submarine working environment <sup>10</sup>.

25  
26  
27 There are several limitations in the present study. First, the cross-sectional design precludes any  
28  
29  
30 conclusions regarding the causality of the relationship between submarine service and risk of  
31  
32  
33 multi-morbidity. However, it seems logical to assume that submarine work increases multi-  
34  
35  
36 morbidity, rather than vice versa, because it is very unlikely that multi-morbidity would drive an  
37  
38  
39 individual to submarine work. Second, the absence of a standardized definition led us to create  
40  
41  
42 our own arbitrary definition for multi-morbidity ( $\geq 2$  coexisting chronic conditions in a single  
43  
44  
45 patient), and it is possible that we underestimated or overestimated the prevalence of multi-  
46  
47  
48 morbidity. Third, selection bias is possible, as it was not possible to blind the physicians to the  
49  
50  
51 personnel's status as submariners or non-submariners. In addition, subjects who visited the clinic  
52  
53  
54 may have had a relatively poor health status, compared to other naval personnel who did not  
55  
56  
57 seek medical attention. Fourth, the specificity of our study population (Korean submariners), and  
58  
59  
60

1  
2  
3  
4 the absence of an age-matched non-navy personnel control group, may limit the generalization of  
5  
6  
7 our findings to other populations.  
8

9  
10 In conclusion, this Korean study revealed that, compared to non-submarine service, submarine  
11  
12 service was significantly associated with a higher risk of multi-morbidity and greater disease  
13  
14 burden, even after adjusting for relevant covariates. These findings suggest that scrupulous  
15  
16 attention is needed to assess submariners and manage their health conditions in multi-  
17  
18 dimensional and holistic ways. Further research is needed to examine the effects of multi-  
19  
20 morbidity on disease patterns, quality of life, and overall mortality among submariners.  
21  
22  
23  
24  
25  
26  
27  
28

29 **Conflicts of interest:** None.  
30

31 **Acknowledgements:** None.  
32  
33

34 **Funding:** This study was supported by funding from the Armed Forces Medical Command, South  
35  
36 Korea.  
37  
38  
39  
40  
41  
42  
43  
44  
45  
46  
47  
48  
49  
50  
51  
52  
53  
54  
55  
56  
57  
58  
59  
60

## References

1. Glynn LG, Valderas JM, Healy P, *et al.* The prevalence of multimorbidity in primary care and its effect on health care utilization and cost. *Family practice* 2011;28:516-23.
2. Fortin M, Bravo G, Hudon C, *et al.* Relationship between multimorbidity and health-related quality of life of patients in primary care. *Quality of Life Research* 2006;15:83-91.
3. Menotti A, Mulder I, Nissinen A, *et al.* Prevalence of morbidity and multimorbidity in elderly male populations and their impact on 10-year all-cause mortality: The FINE study (Finland, Italy, Netherlands, Elderly). *Journal of clinical epidemiology* 2001;54:680-6.
4. Organization WH. *World health statistics 2010*. World Health Organization, 2010.
5. van den Akker M, Buntinx F, Knottnerus JA. Comorbidity or multimorbidity: what's in a name? A review of literature. *The European Journal of General Practice* 1996;2:65-70.
6. Marengoni A, Angleman S, Melis R, *et al.* Aging with multimorbidity: a systematic review of the literature. *Ageing research reviews* 2011;10:430-9.
7. Taylor AW, Price K, Gill TK, *et al.* Multimorbidity-not just an older person's issue. Results from an Australian biomedical study. *BMC public health* 2010;10:1.
8. Barnett K, Mercer SW, Norbury M, *et al.* Epidemiology of multimorbidity and implications for health care, research, and medical education: a cross-sectional study. *The Lancet* 2012;380:37-43.
9. Prados-Torres A, Poblador-Plou B, Calderón-Larrañaga A, *et al.* Multimorbidity patterns in primary care: interactions among chronic diseases using factor analysis. *PloS one* 2012;7:e32190.
10. McLaughlin R, Nielsen L, Waller M. An evaluation of the effect of military service on mortality: quantifying the healthy soldier effect. *Ann Epidemiol* 2008;18:928-36.
11. Brasher KS, Dew AB, Kilminster SG, *et al.* Occupational stress in submariners: the impact of isolated and confined work on psychological well-being. *Ergonomics* 2010;53:305-13.
12. Hartwell J, Durocher N, Gertner J, *et al.* A comparison of the prevalence of metabolic syndrome among fast-attack submariners with us civilian males. 2009.
13. Sandal GM, Leon G, Palinkas L. Human challenges in polar and space environments. *Life in Extreme Environments* 2007:399-414.
14. Strand LA, Martinsen JI, Koefoed VF, *et al.* Cause-specific mortality and cancer incidence among 28 300 Royal Norwegian Navy servicemen followed for more than 50 years. *Scandinavian journal of work, environment & health* 2011:307-15.
15. Hammermeister I, Janus G, Schamarowski F, *et al.* Elevated risk of *Helicobacter pylori* infection in submarine crews. *European Journal of Clinical Microbiology and Infectious Diseases* 1992;11:9-14.
16. Inskip H, Snee M, Styles L. The mortality of Royal Naval submariners 1960-89. *Occupational and environmental medicine* 1997;54:209-15.

17. Oh SW. Obesity and metabolic syndrome in Korea. *Diabetes & metabolism journal* 2011;35:561-6.
18. Hudon C, Fortin M, Soubhi H. Abbreviated guidelines for scoring the Cumulative Illness Rating Scale (CIRS) in family practice. *Journal of clinical epidemiology* 2007;60:212. e1-. e4.
19. Linn BS, LINN MW, Gurel L. Cumulative illness rating scale. *Journal of the American Geriatrics Society* 1968;16:622-6.
20. Miller MD, Paradis CF, Houck PR, *et al.* Rating chronic medical illness burden in geropsychiatric practice and research: application of the Cumulative Illness Rating Scale. *Psychiatry research* 1992;41:237-48.
21. Fortin M, Bravo G, Hudon C, *et al.* Prevalence of multimorbidity among adults seen in family practice. *The Annals of Family Medicine* 2005;3:223-8.
22. Hudon C, Fortin M, Vanasse A. Cumulative Illness Rating Scale was a reliable and valid index in a family practice context. *Journal of clinical epidemiology* 2005;58:603-8.
23. van den Akker M, Buntinx F, Metsemakers JFM, *et al.* Multimorbidity in General Practice: Prevalence, Incidence, and Determinants of Co-Occurring Chronic and Recurrent Diseases. *Journal of Clinical Epidemiology* 1998;51:367-75.
24. Harrison C, Britt H, Miller G, *et al.* Examining different measures of multimorbidity, using a large prospective cross-sectional study in Australian general practice. *BMJ open* 2014;4:e004694.
25. Agborsangaya CB, Lau D, Lahtinen M, *et al.* Multimorbidity prevalence and patterns across socioeconomic determinants: a cross-sectional survey. *BMC public health* 2012;12:1.
26. Jan M, Thomas T, Hooper T. Prescription medication use aboard US submarines during periods underway. 2002.
27. Jee SH, Samet JM, Ohrr H, *et al.* Smoking and cancer risk in Korean men and women. *Cancer Causes & Control* 2004;15:341-8.
28. Gregg MA, Jankosky CJ. Physical readiness and obesity among male US Navy personnel with limited exercise availability while at sea. *Military medicine* 2012;177:1302-7.
29. Caban AJ, Lee DJ, Fleming LE, *et al.* Obesity in US Workers: The National Health Interview Survey, 1986 to 2002. *Am J Public Health* 2005;95:1614-22.
30. Deurenberg P, Yap M, Van Staveren WA. Body mass index and percent body fat: a meta analysis among different ethnic groups. *International Journal of Obesity & Related Metabolic Disorders* 1998;22.
31. Jee SH, Sull JW, Park J, *et al.* Body-mass index and mortality in Korean men and women. *New England Journal of Medicine* 2006;355:779-87.
32. Choi S-W, Lee J-H, Jang Y-K, *et al.* Assessment of ambulatory activity in the Republic of Korea Navy submarine crew. *Undersea & Hyperbaric Medicine* 2010;37:413.
33. De Bacquer D, Van Risseghem M, Clays E, *et al.* Rotating shift work and the metabolic syndrome: a prospective study. *International journal of epidemiology* 2009;38:848-54.

- 1
- 2
- 3
- 4 34. Ross R, Janssen I. Physical activity, total and regional obesity: dose-response
- 5 considerations. *Medicine and science in sports and exercise* 2001;33:S521-7; discussion S8-
- 6 9.
- 7
- 8 35. Reini SA. Hypercortisolism as a potential concern for submariners. *Aviation, space, and*
- 9 *environmental medicine* 2010;81:1114-22.
- 10
- 11 36. Hocking MB, Hocking D. *Air quality in airplane cabins and similar enclosed spaces*.
- 12 Springer Science & Business Media, 2005.
- 13
- 14 37. Burr, Ralph G Palinkas, Lawrence A. Health risks among submarine personnel in the US
- 15 Navy, 1974-1979. DTIC Document 1986
- 16
- 17
- 18
- 19
- 20
- 21
- 22
- 23
- 24
- 25
- 26
- 27
- 28
- 29
- 30
- 31
- 32
- 33
- 34
- 35
- 36
- 37
- 38
- 39
- 40
- 41
- 42
- 43
- 44
- 45
- 46
- 47
- 48
- 49
- 50
- 51
- 52
- 53
- 54
- 55
- 56
- 57
- 58
- 59
- 60

1  
2  
3  
4  
5  
6  
7  
8  
9  
10  
11  
12  
13  
14  
15  
16  
17  
18  
19  
20  
21  
22  
23  
24  
25  
26  
27  
28  
29  
30  
31  
32  
33  
34  
35  
36  
37  
38  
39  
40  
41  
42  
43  
44  
45  
46  
47  
48  
49  
50  
51  
52  
53  
54  
55  
56  
57  
58  
59  
60

For peer review only



Table 1. General and clinical characteristics of study subjects

|                                                | Overall<br>(N=590) | Non-submariner<br>(N=180) | Submariner<br>(N=410) | P-value* |
|------------------------------------------------|--------------------|---------------------------|-----------------------|----------|
| Age, years, mean (SD)                          | 33.2(8.5)          | 31.2(9.9)                 | 34.1(7.7)             | <0.001   |
| Height, cm                                     | 173.8(0.1)         | 173.4(0.1)                | 174.0(0.1)            | 0.189    |
| Body mass index, kg/m <sup>2</sup> , mean (SD) | 25.0(3.0)          | 24.3(3.0)                 | 25.3(2.9)             | <0.001   |
| ≥25 kg/m <sup>2</sup> , N(%)                   | 267(45.3)          | 63(35.0)                  | 204(49.8)             | 0.001    |
| 18.5-24.9 kg/m <sup>2</sup> , N(%)             | 322(54.6)          | 116(64.4)                 | 206(50.2)             |          |
| <18.5 kg/m <sup>2</sup> , N(%)                 | 1(0.2)             | 1(0.6)                    | 0(0)                  |          |
| Alcohol consumption, N(%)                      | 487(82.5)          | 152(84.4)                 | 335(81.7)             | 0.420    |
| Current smoker, N(%)                           | 277(46.9)          | 68(37.8)                  | 209(51.0)             | 0.003    |
| Job-Ranking, N(%)                              |                    |                           |                       | <0001    |
| Officer                                        | 103(17.5)          | 31(17.2)                  | 72(17.6)              |          |
| Petty officer                                  | 465(78.8)          | 127(70.6)                 | 338(82.4)             |          |
| Navy civilian                                  | 22(3.7)            | 22(12.2)                  | 0(0%)                 |          |
| Mean (SD) years of service in submarine        | NA                 | 0                         | 7.1(5.3)              | NA       |

N: number of subjects, SD: standard deviation, NA: not applicable

\* P-value was obtained by t test for continuous variables and chi-square test for categorical variable

Table 2. Comparison of the number of chronic health problems and mean Cumulative Illness Rating Scale score between submariners and non-submariners by age group

|                                                     | Overall        |            |          | <30 years      |            |          | 30-39 years    |            |          | ≥40 years      |            |          |
|-----------------------------------------------------|----------------|------------|----------|----------------|------------|----------|----------------|------------|----------|----------------|------------|----------|
|                                                     | Non-submariner | Submariner | P-value* |
| Chronic health problems, N (%)                      |                |            |          |                |            |          |                |            |          |                |            |          |
| 0                                                   | 96(53.3)       | 126(30.7)  | <0.001   | 62(61.4)       | 56(44.8)   | 0.009    | 17(51.5)       | 52(27.8)   | 0.012    | 17(37.0)       | 18(18.4)   | 0.005    |
| 1                                                   | 63(35.0)       | 152(37.1)  |          | 33(32.7)       | 47(37.6)   |          | 12(36.4)       | 75(40.1)   |          | 18(39.1)       | 30(30.6)   |          |
| ≥2                                                  | 21(11.7)       | 132(32.2)  |          | 6(5.9)         | 22(17.6)   |          | 4(12.1)        | 60(32.1)   |          | 11(23.9)       | 50(51.0)   |          |
| Cumulative Illness Rating Scale score, mean(SD)     |                |            |          |                |            |          |                |            |          |                |            |          |
|                                                     | 1.66(1.16)     | 2.35(1.51) | <0.001   | 1.31(1.03)     | 1.70(1.23) | 0.010    | 1.64(1.0)      | 2.33(1.43) | 0.008    | 2.43(1.21)     | 3.23(1.59) | 0.003    |
| N: number, SD: standard deviation                   |                |            |          |                |            |          |                |            |          |                |            |          |
| * P-value was obtained by chi-square test or t-test |                |            |          |                |            |          |                |            |          |                |            |          |

Table 3. Association of submarine service with the risk of multi-morbidity<sup>†</sup> and high disease burden<sup>‡</sup>

|                                                                                                                         | Years of submarine service |                      |                      |                      | P <sub>trend</sub> <sup>¶</sup> |
|-------------------------------------------------------------------------------------------------------------------------|----------------------------|----------------------|----------------------|----------------------|---------------------------------|
|                                                                                                                         | 0 year<br>(N=180)          | 1-4 years<br>(N=158) | 5-9 years<br>(N=107) | ≥10 years<br>(N=145) |                                 |
| OR (95% CI)* for the association with multi-morbidity <sup>†</sup>                                                      |                            |                      |                      |                      |                                 |
| Model 1                                                                                                                 | 1                          | 3.46(1.75-6.87)      | 2.59(1.37-4.89)      | 3.97(2.19-7.19)      | <0.001                          |
| Model 2                                                                                                                 | 1                          | 3.97(1.91-8.25)      | 2.75(1.41-5.38)      | 3.78(2.06-6.94)      | <0.001                          |
| OR (95% CI)* for the association with the high disease burden <sup>‡</sup> estimated by Cumulative Illness Rating Scale |                            |                      |                      |                      |                                 |
| Model 1                                                                                                                 | 1                          | 1.86(1.04-3.32)      | 2.36(1.37-4.05)      | 2.77(1.63-4.71)      | 0.001                           |
| Model 2                                                                                                                 | 1                          | 2.19(1.19-4.02)      | 2.78(1.58-4.89)      | 2.94(1.71-5.04)      | 0.001                           |

OR (95% CI): odds ratio (95% confidence interval)

\* estimated by multiple logistic regression analysis. In model 1, age was adjusted. In model 2, age, alcohol intake, smoking status (not included in the analysis for the disease burden), and job-ranking were adjusted.

<sup>†</sup> defined as two or more chronic health problems in a person

<sup>‡</sup> defined as Cumulative Illness Rating Scale score  $\geq 3$  <sup>¶</sup> assessed by linear regression analysis, for which year of service was put in the model as a continuous variable.

1  
2  
3  
4  
5  
6  
7  
8  
9  
10  
11  
12  
13  
14  
15  
16  
17  
18  
19  
20  
21  
22  
23  
24  
25  
26  
27  
28  
29  
30  
31  
32  
33  
34  
35  
36  
37  
38  
39  
40  
41  
42  
43  
44  
45  
46  
47  
48  
49

For peer review only

1  
2  
3  
4  
5  
6  
7  
8  
9  
10  
11  
12  
13  
14  
15  
16  
17  
18  
19  
20  
21  
22  
23  
24  
25  
26  
27  
28  
29  
30  
31  
32  
33  
34  
35  
36  
37  
38  
39  
40  
41  
42  
43  
44  
45  
46  
47  
48  
49

For peer review only

Supplementary table 1. Relationship between submarine service year and multi-morbidity and its burden  
: A subgroup analysis in submariners

|                                                                                                                         | Years of submarine service |                      |                      | P <sub>trend</sub> <sup>¶</sup> |
|-------------------------------------------------------------------------------------------------------------------------|----------------------------|----------------------|----------------------|---------------------------------|
|                                                                                                                         | 1-4 years<br>(N=158)       | 5-9 years<br>(N=107) | ≥10 years<br>(N=145) |                                 |
| OR (95% CI)* for the association with multi-morbidity <sup>†</sup>                                                      |                            |                      |                      |                                 |
| Model 1                                                                                                                 | 1                          | 0.78(0.38,1.61)      | 1.23(0.52,2.91)      | 0.286                           |
| Model 2                                                                                                                 | 1                          | 0.60(0.28,1.27)      | 0.69(0.26,1.82)      | 0.865                           |
| OR (95% CI)* for the association with the high disease burden <sup>‡</sup> estimated by Cumulative Illness Rating Scale |                            |                      |                      |                                 |
| Model 1                                                                                                                 | 1                          | 1.12(0.56,2.21)      | 1.21(0.52,2.80)      | 0.833                           |
| Model 2                                                                                                                 | 1                          | 0.89(0.44,1.83)      | 0.70(0.28,1.78)      | 0.272                           |

OR (95% CI): odds ratio (95% confidence interval)

\* estimated by multiple logistic regression analysis. In model 1, age was adjusted. In model 2, age, alcohol intake, smoking status (not included in the analysis for the disease burden), and job-ranking were adjusted.

† defined as two or more chronic health problems in a person

‡ defined as Cumulative Illness Rating Scale score ≥ 3 ¶ assessed by linear regression analysis, for which year of service was put in the model as a continuous variable.

Supplementary Table 2. Distribution of symptoms in each organ domain of Cumulative Illness Rating Scale

| Organ domains                 | All Subjects   |            |          | After excluding smokers and obese subjects |            |          |
|-------------------------------|----------------|------------|----------|--------------------------------------------|------------|----------|
|                               | Non-submariner | Submariner | P-value* | Non-submariner                             | Submariner | P-value* |
|                               | N(%)           | N(%)       |          | N(%)                                       | N(%)       |          |
| Overall                       | 84(46.7)       | 284(69.3)  | <0.001   | 13(17.6)                                   | 38(35.8)   | 0.007    |
| Cardiac                       | 2(1.1)         | 4(1.0)     | 0.880    | 0(0)                                       | 1(0.9)     | 1.000    |
| Vascular                      | 21(11.7)       | 125(30.5)  | <0.001   | 6(8.1)                                     | 23(21.1)   | 0.023    |
| Respiratory                   | 74(41.1)       | 239(58.3)  | <0.001   | 6(8.1)                                     | 16(14.7)   | 0.180    |
| Eyes ear, nose, and throat    | 53(29.4)       | 85(20.7)   | 0.021    | 23(32.4)                                   | 21(19.3)   | 0.042    |
| Upper gastrointestinal tract  | 5(2.8)         | 8(2.0)     | 0.529    | 3(4.1)                                     | 1(0.9)     | 0.182    |
| Lower gastrointestinal tract  | 9(5.0)         | 12(2.9)    | 0.211    | 6(8.1)                                     | 5(4.6)     | 0.356    |
| Musculoskeletal or tegumental | 34(18.9)       | 96(23.4)   | 0.222    | 15(20.3)                                   | 22(20.2)   | 0.989    |
| Neurological                  | 5(2.8)         | 11(2.7)    | 0.948    | 1(1.4)                                     | 3(2.8)     | 0.648    |
| Endocrine, metabolic, breast  | 63(35.0)       | 211(51.5)  | <0.001   | 2(2.7)                                     | 11(10.1)   | 0.078    |
| Other organ                   | 4(2.2)         | 19(4.6)    | 0.163    | 3(4.1)                                     | 2(1.8)     | 0.395    |

N: number, SD: standard deviation

\* P-value was obtained by chi-square test or Fisher's exact test

1  
2  
3  
4  
5  
6  
7  
8  
9  
10  
11  
12  
13  
14  
15  
16  
17  
18  
19  
20  
21  
22  
23  
24  
25  
26  
27  
28  
29  
30  
31  
32  
33  
34  
35  
36  
37  
38  
39  
40  
41  
42  
43  
44  
45  
46  
47

For peer review only



STROBE Statement—Checklist of items that should be included in reports of *cross-sectional studies*

|                              | Item No | Recommendation                                                                                                                                                                                                                |
|------------------------------|---------|-------------------------------------------------------------------------------------------------------------------------------------------------------------------------------------------------------------------------------|
| <b>Title and abstract</b>    | 1       | (a) Indicate the study's design with a commonly used term in the title or the abstract : <b>checked</b>                                                                                                                       |
|                              |         | (b) Provide in the abstract an informative and balanced summary of what was done and what was found : <b>checked</b>                                                                                                          |
| <b>Introduction</b>          |         |                                                                                                                                                                                                                               |
| Background/rationale         | 2       | Explain the scientific background and rationale for the investigation being reported : <b>checked</b>                                                                                                                         |
| Objectives                   | 3       | State specific objectives, including any prespecified hypotheses : <b>checked</b>                                                                                                                                             |
| <b>Methods</b>               |         |                                                                                                                                                                                                                               |
| Study design                 | 4       | Present key elements of study design early in the paper : <b>checked</b>                                                                                                                                                      |
| Setting                      | 5       | Describe the setting, locations, and relevant dates, including periods of recruitment, exposure, follow-up, and data collection : <b>checked</b>                                                                              |
| Participants                 | 6       | (a) Give the eligibility criteria, and the sources and methods of selection of participants : <b>checked</b>                                                                                                                  |
| Variables                    | 7       | Clearly define all outcomes, exposures, predictors, potential confounders, and effect modifiers. Give diagnostic criteria, if applicable : <b>checked</b>                                                                     |
| Data sources/<br>measurement | 8*      | For each variable of interest, give sources of data and details of methods of assessment (measurement). Describe comparability of assessment methods if there is more than one group : <b>checked</b>                         |
| Bias                         | 9       | Describe any efforts to address potential sources of bias : <b>checked</b>                                                                                                                                                    |
| Study size                   | 10      | Explain how the study size was arrived at : <b>checked</b>                                                                                                                                                                    |
| Quantitative variables       | 11      | Explain how quantitative variables were handled in the analyses. If applicable, describe which groupings were chosen and why : <b>checked</b>                                                                                 |
| Statistical methods          | 12      | (a) Describe all statistical methods, including those used to control for confounding : <b>checked</b>                                                                                                                        |
|                              |         | (b) Describe any methods used to examine subgroups and interactions : <b>checked</b>                                                                                                                                          |
|                              |         | (c) Explain how missing data were addressed : <b>checked</b>                                                                                                                                                                  |
|                              |         | (d) If applicable, describe analytical methods taking account of sampling strategy                                                                                                                                            |
|                              |         | (e) Describe any sensitivity analyses : <b>checked</b>                                                                                                                                                                        |
| <b>Results</b>               |         |                                                                                                                                                                                                                               |
| Participants                 | 13*     | (a) Report numbers of individuals at each stage of study—eg numbers potentially eligible, examined for eligibility, confirmed eligible, included in the study, completing follow-up, and analysed : <b>checked</b>            |
|                              |         | (b) Give reasons for non-participation at each stage : <b>checked</b>                                                                                                                                                         |
|                              |         | (c) Consider use of a flow diagram : <b>checked</b>                                                                                                                                                                           |
| Descriptive data             | 14*     | (a) Give characteristics of study participants (eg demographic, clinical, social) and information on exposures and potential confounders : <b>checked</b>                                                                     |
|                              |         | (b) Indicate number of participants with missing data for each variable of interest : <b>checked</b>                                                                                                                          |
| Outcome data                 | 15*     | Report numbers of outcome events or summary measures : <b>checked</b>                                                                                                                                                         |
| Main results                 | 16      | (a) Give unadjusted estimates and, if applicable, confounder-adjusted estimates and their precision (eg, 95% confidence interval). Make clear which confounders were adjusted for and why they were included : <b>checked</b> |
|                              |         | (b) Report category boundaries when continuous variables were categorized :                                                                                                                                                   |

|                          |    |                                                                                                                                                                                             |
|--------------------------|----|---------------------------------------------------------------------------------------------------------------------------------------------------------------------------------------------|
|                          |    | <b>checked</b>                                                                                                                                                                              |
|                          |    | (c) If relevant, consider translating estimates of relative risk into absolute risk for a meaningful time period : <b>Not applicable</b>                                                    |
| Other analyses           | 17 | Report other analyses done—eg analyses of subgroups and interactions, and sensitivity analyses : <b>checked</b>                                                                             |
| <b>Discussion</b>        |    |                                                                                                                                                                                             |
| Key results              | 18 | Summarise key results with reference to study objectives : <b>checked</b>                                                                                                                   |
| Limitations              | 19 | Discuss limitations of the study, taking into account sources of potential bias or imprecision. Discuss both direction and magnitude of any potential bias : <b>checked</b>                 |
| Interpretation           | 20 | Give a cautious overall interpretation of results considering objectives, limitations, multiplicity of analyses, results from similar studies, and other relevant evidence : <b>checked</b> |
| Generalisability         | 21 | Discuss the generalisability (external validity) of the study results : <b>checked</b>                                                                                                      |
| <b>Other information</b> |    |                                                                                                                                                                                             |
| Funding                  | 22 | Give the source of funding and the role of the funders for the present study and, if applicable, for the original study on which the present article is based : <b>checked</b>              |

\*Give information separately for exposed and unexposed groups.

**Note:** An Explanation and Elaboration article discusses each checklist item and gives methodological background and published examples of transparent reporting. The STROBE checklist is best used in conjunction with this article (freely available on the Web sites of PLoS Medicine at <http://www.plosmedicine.org/>, Annals of Internal Medicine at <http://www.annals.org/>, and Epidemiology at <http://www.epidem.com/>). Information on the STROBE Initiative is available at [www.strobe-statement.org](http://www.strobe-statement.org).

# BMJ Open

## The association between submarine service and multi-morbidity: a cross-sectional study of Korean naval personnel

|                                 |                                                                                                                                                                                           |
|---------------------------------|-------------------------------------------------------------------------------------------------------------------------------------------------------------------------------------------|
| Journal:                        | <i>BMJ Open</i>                                                                                                                                                                           |
| Manuscript ID                   | bmjopen-2017-017776.R2                                                                                                                                                                    |
| Article Type:                   | Research                                                                                                                                                                                  |
| Date Submitted by the Author:   | 10-Aug-2017                                                                                                                                                                               |
| Complete List of Authors:       | Kang, Jihun; Kosin University Gospel Hospital, Kosin University College of Medicine, Department of Family Medicine<br>Song, Yun-Mi; Samsung Medical Center, Department of Family Medicine |
| <b>Primary Subject Heading</b>: | Epidemiology                                                                                                                                                                              |
| Secondary Subject Heading:      | General practice / Family practice                                                                                                                                                        |
| Keywords:                       | submarine, multimorbidity, disease burden, occupational exposure                                                                                                                          |
|                                 |                                                                                                                                                                                           |

SCHOLARONE™  
Manuscripts

1  
2  
3  
4 **The association between submarine service and multi-morbidity: a cross-sectional study of**

5  
6  
7 **Korean naval personnel**

8  
9  
10 Jihun Kang, MD, MS<sup>1</sup> and Yun-Mi Song, MD, MPH, PhD<sup>2</sup>

11  
12  
13  
14  
15  
16 <sup>1</sup> Department of Family Medicine, Kosin University Gospel Hospital, Kosin University College of  
17  
18 Medicine, Busan, Republic of Korea

19  
20  
21 <sup>2</sup> Department of Family Medicine, Samsung Medical Center, Sungkyunkwan University School of  
22  
23 Medicine, Seoul, Republic of Korea

24  
25  
26  
27  
28  
29 **Corresponding author:**

30  
31  
32 Yun-Mi Song, MD, MPH, PhD

33  
34  
35 Department of Family Medicine, Samsung Medical Center, Sungkyunkwan University School of  
36  
37 Medicine, 81 Irwon-ro, Gangnam-gu, Seoul 135-710, Republic of Korea

38  
39  
40 Tel: +82-2-3410-2442; Fax: +82-2-3410-0388; Email: [yunmisong@skku.edu](mailto:yunmisong@skku.edu)

41  
42  
43  
44  
45  
46 **Contributorship statements**

47  
48 Dr. Jihun Kang (first author) conceived of and designed the study; collected, analyzed, and  
49  
50 interpreted the data; and wrote and revised the report. Prof. Yun-Mi Song (corresponding author)  
51  
52  
53  
54 conceived of and designed the study; collected, analyzed, and interpreted the data; and provided  
55  
56  
57

1  
2  
3  
4 important intellectual context and critical revisions for the report. Both authors have approved the  
5  
6  
7 final version for publication, and accept responsibility for the accuracy and integrity of the data  
8  
9  
10 and the analysis.  
11  
12  
13  
14  
15  
16  
17  
18  
19  
20  
21  
22  
23  
24  
25  
26  
27  
28  
29  
30  
31  
32  
33  
34  
35  
36  
37  
38  
39  
40  
41  
42  
43  
44  
45  
46  
47  
48  
49  
50  
51  
52  
53  
54  
55  
56  
57  
58  
59  
60

For peer review only

**ABSTRACT**

*Objective:* We aimed to estimate the prevalence of multi-morbidity ( $\geq 2$  chronic health problems) among Korean submariners and to evaluate the association between submarine service, and multi-morbidity and disease burden.

*Study Design and Setting:* This cross-sectional study included 590 naval personnel who visited a Korean primary care clinic during 2014–2015. Data regarding general characteristics and morbidities were collected from medical records, and disease burden was assessed using the Cumulative Illness Rating Scale (CIRS). Multiple logistic regression analysis was used to evaluate the association between submarine service, and multi-morbidity and disease burden.

*Results:* The prevalence of multi-morbidity was 11.7% among 180 non-submariners and 32.2% among 410 submariners. The prevalence of multi-morbidity and the CIRS scores gradually increased with age. Submarine service was associated with higher risk of multi-morbidity and disease burden compared with non-submarine service even after adjusting for age, alcohol consumption, smoking status, and naval rank. However, a dose-response relationship was not evident between the duration of submarine service and the risk of multi-morbidity as well as high disease burden.

*Conclusions:* Submarine service was significantly associated with a higher risk of multi-morbidity and greater disease burden than non-submarine service. This finding suggests that multi-dimensional and holistic healthcare approaches are needed for submariners.

1  
2  
3  
4 **Keywords:** Submarine, multi-morbidity, disease burden, occupational exposure  
5  
6  
7  
8  
9  
10

11  
12 **Strengths and limitations of this study**  
13

14  
15 This is the first study to evaluate multi-morbidity as well as disease burden in submariners.  
16

17  
18 The cross-sectional design precludes any conclusions regarding the direction of causality in the  
19  
20 relationship between submarine service and multi-morbidity.  
21

22  
23 The specificity of our study population, Korean submariners, limits the generalization of our  
24  
25 findings to other populations.  
26  
27  
28  
29  
30  
31  
32  
33  
34  
35  
36  
37  
38  
39  
40  
41  
42  
43  
44  
45  
46  
47  
48  
49  
50  
51  
52  
53  
54  
55  
56  
57  
58  
59  
60

## INTRODUCTION

Multi-morbidity (the coexistence of  $\geq 2$  long-term diseases or medical conditions in one person) is associated with increased medical expenditure <sup>1</sup>, decreased quality of life <sup>2</sup>, and higher mortality <sup>3</sup>. With increasing life expectancy and an aging population <sup>4</sup>, multi-morbidity has become an important public health issue <sup>5</sup> because elderly people are likely to have multiple coexisting medical conditions. Therefore, most multi-morbidity research has been performed among older populations <sup>3 6</sup>, although multi-morbidity is not just an issue for elderly people <sup>7</sup>. A recent study found that >50% of people with multiple medical conditions were <65 years old <sup>8</sup>, which indicates that multi-morbidity should be investigated in populations with a broader age range <sup>9</sup>.

Military personnel are often relatively young people who undergo physical training and military drilling before deployment. Among military personnel, submariners are a unique population because they complete a specialized selection process and training to ensure that they can perform their demanding duties. Thus, submariners are considered a relatively healthy group at the time of their recruitment <sup>10</sup>. However, submariners are concurrently exposed to various environmental risk factors that can affect their health status, such as their confined work environment, physical inactivity, excessive caloric intake, circadian disruption, and isolation from family during deployment <sup>11-13</sup>. Few studies evaluating the effects of these occupational risk factors on submariners' health status have reported controversial findings. A Norwegian study revealed that submariners had increased risk of bladder cancer and non-melanoma skin cancer <sup>14</sup>.



1  
2  
3  
4 Similarly, a German study revealed that submariners had a higher rate of *Helicobacter pylori*  
5  
6  
7 infection compared to other naval personnel<sup>15</sup>. On the other hand, a British study revealed that  
8  
9  
10 submarine service was not associated with increased risk of mortality or specific diseases<sup>16</sup>.

11  
12 Moreover, little is known about whether submarine service is associated with multi-morbidity.

13  
14  
15 Therefore, the present study aimed to estimate the prevalence of multi-morbidity among Korean  
16  
17  
18 submariners and to evaluate the association between submarine service, and multi-morbidity and  
19  
20  
21 disease burden by comparing submariners and non-submarine naval personnel.

## 22 23 24 25 26 **METHODS AND MATERIALS**

### 27 28 29 *Study design and participants*

30  
31  
32 This cross-sectional study analyzed data from the medical records of naval personnel who  
33  
34  
35 visited a primary care facility at the military base in Jinhae (Republic of Korea) between April 2014  
36  
37  
38 and March 2015. Of the 1,004 men who visited the clinic, we excluded 332 men who had a  
39  
40  
41 temporary service commission (conscripted individuals who were not eligible for submarine  
42  
43  
44 service) and 82 men with missing information regarding their socio-demographic characteristics  
45  
46  
47 (N = 15) or disease status (N = 67). Thus, 590 permanently commissioned naval personnel who  
48  
49  
50 volunteered for professional naval service were ultimately included in the present study. We  
51  
52  
53 defined submariner as a person who had completed submarine training courses and worked in a  
54  
55  
56 submarine for  $\geq 6$  months, and categorized the subjects as either submariners (410 men) or non-

1  
2  
3  
4 submariners (180 men).  
5

6  
7 The study's protocol complied with the STROBE guidelines. In addition, the protocol was  
8  
9 approved and the requirement for informed consent was waived by the institutional review board  
10  
11 of the Armed Forces Medical Command in Seongnam, South Korea (AFMC-15088-IRB-15-068).  
12  
13

#### 14 *Data collection*

15  
16  
17 The subjects' socio-demographic data (age, years of submarine service, and naval rank),  
18  
19 anthropometric data (height and weight), and health behaviors (smoking status and alcohol  
20  
21 consumption) were obtained by reviewing their medical records. Current smokers were defined as  
22  
23 individuals who had smoked >100 cigarettes during their life and were currently smoking. Self-  
24  
25 reporting was used to identify individuals who consumed alcohol. Body mass index (BMI, kg/m<sup>2</sup>)  
26  
27 was calculated as weight divided by height squared, and we defined obesity as a BMI of ≥25  
28  
29 kg/m<sup>2</sup>, based on the definition for the Korean population <sup>17</sup>.  
30  
31  
32  
33  
34  
35  
36

37 We identified co-existing chronic health problems in several ways. First, using a self-  
38  
39 administered questionnaire, we asked the study subjects to answer "yes" or "no" to each question  
40  
41 regarding whether they had experienced or had received treatment for the chronic conditions:  
42  
43 diabetes, chronic obstructive pulmonary disorder, asthma, hypertension, dyslipidemia, heart  
44  
45 disease (congestive heart failure and ischemic heart disease), stroke, gastro-esophageal reflux,  
46  
47 sleep apnea, arthritis, kidney disease, or psychological disorders. Next, an additional physician-led  
48  
49 examination was carried out to identify any unreported conditions. In addition, we reviewed the  
50  
51  
52  
53  
54  
55  
56  
57  
58  
59  
60

1  
2  
3  
4 medical records of each study subject. We reviewed medical records from the date of  
5  
6  
7 implementation of the electronic medical record system (2013) onwards and data was extracted  
8  
9  
10 and medical conditions classified using disease codes from the 10<sup>th</sup> revision of the International  
11  
12 Statistical Classification of Diseases and Health Problems (ICD-10). The presence of multi-  
13  
14 morbidity ( $\geq 2$  chronic medical conditions) was evaluated by counting the number of chronic  
15  
16 health conditions that each subject had.  
17  
18  
19

20  
21 We estimated disease burdens based on the illnesses and their severities using the Cumulative  
22  
23 Illness Rating Scale (CIRS) <sup>18</sup>. This tool assesses symptoms in 14 organ domains (cardiac; vascular;  
24  
25 hematological; respiratory; eye, ear, nose, and throat; upper gastrointestinal tract; lower  
26  
27 gastrointestinal tract; hepatic and pancreatic; renal; genitourinary; musculoskeletal and tegumental;  
28  
29 gastrointestinal tract; hepatic and pancreatic; renal; genitourinary; musculoskeletal and tegumental;  
30  
31 neurological; endocrine, metabolic, breast; and psychiatric). The CIRS was originally developed by  
32  
33 Linn et al. <sup>19</sup> to assess chronic medical problems in a comprehensive manner, and was  
34  
35 subsequently revised by Miller et al. <sup>20</sup> to measure common morbidities among elderly patients.  
36  
37  
38 This tool was later modified by Hudon et al. <sup>18</sup> to estimate multi-morbidity in the primary care  
39  
40 setting, and was found to be a reliable and valid tool <sup>2 21 22</sup>. The CIRS score for each organ system  
41  
42 ranges from 0 (no problems affecting that system) to 4 (extremely severe problems), and the total  
43  
44 CIRS score is calculated by adding the scores for all 14 organ domains (range: 0–56). If a person  
45  
46 currently smokes or has a high BMI ( $\geq 25$  kg/m<sup>2</sup>), then the person is considered to have disease  
47  
48 burden in the respiratory and metabolic systems, respectively. The total CIRS score has a left-  
49  
50  
51  
52  
53  
54  
55  
56  
57  
58  
59  
60

1  
2  
3  
4 skewed distribution because it is very rare for a person to have severe medical conditions in every  
5  
6  
7 organ system.

### 8 9 10 *Statistical analysis*

11  
12 The demographic characteristics, distributions of chronic health problems, and CIRS scores  
13  
14 were compared between submariners and non-submariners using the chi-square test and t-test,  
15  
16 as appropriate. We also compared the distributions of chronic health problems and CIRS scores  
17  
18 for three age strata (<30 years, 30–39 years, and ≥40 years) because the age distributions were  
19  
20 significantly different between the submariners and non-submariners. There is no standardized  
21  
22 cut-off value for high disease burden based on CIRS score, and we arbitrarily defined subjects in  
23  
24 the upper tertile of CIRS scores (≥3) as having high disease burden. We also evaluated the  
25  
26 associations of submarine service with multi-morbidity and high disease burden using multiple  
27  
28 logistic regression analysis after adjusting for age, alcohol consumption, smoking status, and naval  
29  
30 rank (reference group: non-submariners with 0 years of submarine service). However, we did not  
31  
32 include smoking status as a covariate in the model for disease burden, because it is a component  
33  
34 of the CIRS score. All statistical analyses were performed using PASW Statistics software (version  
35  
36 21.0; SPSS Inc., Chicago, IL, USA). Two-tailed *P*-values of <0.05 were considered significant.  
37  
38  
39  
40  
41  
42  
43  
44  
45  
46  
47  
48  
49  
50

## 51 **RESULTS**

52  
53  
54 Table 1 shows the subjects' characteristics. Compared to non-submariners, submariners were  
55  
56  
57  
58  
59  
60

1  
2  
3  
4 significantly older, were more likely to be current smokers and obese, and had a higher naval rank  
5  
6  
7 (p < 0.05). Table 2 shows the distributions of chronic health problems and CIRS scores among all  
8  
9  
10 subjects and in the three age strata. The prevalence of multi-morbidity was 11.7% among non-  
11  
12 submariners and 32.2% among submariners. The prevalence of multi-morbidity and the CIRS  
13  
14 scores gradually increased with age among both submariners and non-submariners. The number  
15  
16 of chronic health problems and CIRS scores were significantly higher among submariners than  
17  
18 non-submariners, across all age groups.  
19  
20  
21

22  
23  
24 Table 3 shows the adjusted associations of submarine service with risks of multi-morbidity and  
25  
26 high disease burden (CIRS of  $\geq 3$ ). Submarine service of one year or longer was positively  
27  
28 associated with multi-morbidity and disease burden as compared with less than one-year of  
29  
30 submarine service. This association remained significant after adjusting for age, alcohol  
31  
32 consumption, smoking status, and naval rank. However, a dose-response relationship according to  
33  
34 duration of submarine service was not evident (Supplementary Table 1).  
35  
36  
37  
38  
39

40  
41 Supplementary Table 2 shows the prevalence of symptoms in each CIRS organ domain.  
42  
43 Compared to non-submariners, submariners more frequently experienced symptoms in the  
44  
45 vascular, respiratory, ear/nose/throat, and endocrine domains. Both groups had similar prevalences  
46  
47 of symptoms in the cardiac, upper and lower gastrointestinal, musculoskeletal or tegumental, and  
48  
49 neurological domains. When we excluded current smokers and obese subjects from the CIRS  
50  
51 domain analyses, no significant difference was observed in the endocrine and respiratory domain.  
52  
53  
54  
55  
56  
57  
58  
59  
60

## DISCUSSION

The present study is the first to examine the prevalence of multi-morbidity and disease burden among submariners. Use of the CIRS score allowed us to provide more comprehensive data, especially regarding the disease burden, compared to previous studies<sup>3 8 23</sup>. Based on our findings, approximately 30% of submariners had multi-morbidity, and this rate was approximately 3 times greater than the prevalence among non-submariner naval personnel (11.7%). The higher rate of multi-morbidity among submariners was consistently observed in different age strata, which suggests that the significant difference in the multi-morbidity rate was not caused by different age distributions.

A previous study in primary care setting has shown that prevalence of multi-morbidity might be comparable between studies when multi-morbidity is defined as  $\geq 2$  disease entities, regardless of the specific disease entity definitions in each study<sup>24</sup>. The prevalence of multi-morbidity varies according to study. After excluding elderly subjects (to simplify the age-based comparisons), we found that the prevalence of multi-morbidity among non-submariners was 11.7%, which was lower than the reported prevalence in the Netherlands (24.2% among 20–59-year-old men from the general population)<sup>23</sup>, Scotland (20.5% among 25–65-year-old men from the general population)<sup>8</sup>, and Canada (20.4% among 18–64-year-old men from the general population)<sup>25</sup>. However, the difference in the prevalence of multi-morbidity across studies might have been a

1  
2  
3  
4 result of the varying definitions and methods for assessing multi-morbidity, as well as the study  
5  
6  
7 settings.

8  
9  
10 In the present study, submariners more frequently experienced symptoms in the vascular,  
11  
12 respiratory, endocrine, and ear/nose/throat CIRS domains than non-submariners (Supplementary  
13  
14 Table 2). This finding is partially consistent with the findings of a previous study, which revealed  
15  
16 that respiratory infections and elevated blood pressure without a hypertension diagnosis were  
17  
18 common morbidities among American submariners <sup>26</sup>. We assume that our findings may be  
19  
20 related to the fact that current smoking and obesity are counted as respiratory and endocrine  
21  
22 diseases, respectively, in the CIRS system <sup>18</sup>. Although the smoking rate was lower in submariners  
23  
24 than in non-submariners, worse air quality from the enclosed space of a submarine might have  
25  
26 contributed to the more prevalent respiratory and ear/nose/throat symptoms.  
27  
28  
29  
30  
31  
32  
33  
34

35 We observed positive associations between age and multi-morbidity among both non-  
36  
37 submariners and submariners, and this association has been clearly documented in previous  
38  
39 studies <sup>6 8 23</sup>. In addition, our finding of increasing disease burden (estimated using CIRS) with age  
40  
41 was similar to the findings from a Canadian study <sup>21</sup>. However, submariners had a greater  
42  
43 prevalence of multi-morbidity and greater disease burden in all age groups, compared to non-  
44  
45 submariners. Although the current smoking rate among submariners was comparable to that  
46  
47 among the general population of Korean men (47% in 2012) <sup>27</sup>, the higher smoking rate among  
48  
49 submariners may explain their greater disease burden, as current smoking is considered a  
50  
51  
52  
53  
54  
55  
56  
57  
58  
59  
60

1  
2  
3  
4 respiratory problem in the CIRS system. In addition, the submariners' obesity rate was higher than  
5  
6  
7 that among Korean non-submariners, American small submarine crews (17.9% in 2011)<sup>28</sup>, and  
8  
9  
10 American police officers and firefighters (30.7% in 2002)<sup>29</sup>, which may also explain the difference  
11  
12  
13 in disease burden. Although different cut-off values for obesity are used for Korean and American  
14  
15 populations ( $\geq 25$  kg/m<sup>2</sup> vs.  $\geq 30$  kg/m<sup>2</sup>), we think the results are comparable in terms of obesity  
16  
17  
18 diagnoses because Asian populations have a higher body fat composition for any given BMI than  
19  
20  
21 Caucasian populations<sup>30</sup> and increased all-cause mortality is associated with BMI of  $\geq 25$  kg/m<sup>2</sup> in  
22  
23  
24 the Korean population<sup>31</sup>.

25  
26  
27 Unfortunately, the confined submarine environment is not conducive to vigorous activity and  
28  
29  
30 exercise during deployment<sup>32</sup>, and submariners' caloric intake tends to exceed their expenditure  
31  
32  
33 during this time<sup>12</sup>. Moreover, submariners' shift work schedules during their deployment may  
34  
35  
36 increase their risk of metabolic syndrome<sup>33</sup>. Thus, the combination of low physical activity levels,  
37  
38  
39 excessive caloric intake, and circadian misalignment may elevate the risk of accumulating  
40  
41  
42 abdominal and visceral fat<sup>34</sup>, which could explain the prevalence of obesity among submariners.  
43  
44  
45 These factors may also have contributed to the high disease burden and prevalence of multi-  
46  
47  
48 morbidity among submariners, compared to non-submariners.

49  
50  
51 As age is strongly associated with multi-morbidity<sup>8 23</sup>, it is possible that the association  
52  
53  
54 between multi-morbidity and service years was confounded by age. However, after adjusting for  
55  
56  
57 age, the positive associations of submarine service with multi-morbidity as well as disease burden  
58  
59  
60



1  
2  
3  
4 were only slightly attenuated. Thus, our findings negate a significant confounding effect of age on  
5  
6  
7 the association.

8  
9  
10 Submariners are exposed to several health risk factors, such as *Helicobacter pylori* infection,  
11  
12 that are related to overcrowding and extremely limited sanitary facilities <sup>15</sup>, increased cortisol  
13  
14 levels related to chronic stress state and sleep deprivation <sup>35</sup>, and low air quality in an enclosed  
15  
16 space <sup>36</sup>. These risk factors may have cumulative negative effects on submariners' health status,  
17  
18 which might partially explain the higher prevalence of multi-morbidity in this population.  
19  
20  
21 Nevertheless, previous studies have reported conflicting findings regarding the health of  
22  
23  
24 submariners. For example, a study by the American Navy revealed that submarine duty did not  
25  
26 increase the risk of hospitalization for 16 major diagnostic categories and submarine-associated  
27  
28 diagnoses <sup>37</sup>. However, we could not directly compare the findings of that study and our study, as  
29  
30 we used different methods to identify morbidities (outpatient clinical records vs. hospitalization  
31  
32 records and multi-morbidity vs. single disease entities).  
33  
34  
35  
36  
37  
38  
39

40 Few studies have evaluated the risk of mortality among submariners, and those studies have  
41  
42 reported no significant association. A British study of Royal Navy submarine crews concluded that  
43  
44 working in a submarine was not associated with increased cancer mortality, although the authors  
45  
46 detected an increase in liver cirrhosis-related mortality that might not be attributable to the  
47  
48 submarine environment <sup>16</sup>. A Norwegian study also failed to detect differences in all-cause  
49  
50 mortality among surface vessel and submarine crews, and the submariners had a lower rate of all-  
51  
52  
53  
54  
55  
56  
57  
58  
59  
60

1  
2  
3  
4 cause mortality than the general population of Norwegian men <sup>14</sup>. Several explanations were  
5  
6  
7 proposed for the null finding from the Norwegian study. First, the participants had relatively low  
8  
9  
10 mean service times (2.7 years), which may have been insufficient to noticeably affect the subjects'  
11  
12 mortality. Another plausible explanation is that morbidity may not significantly affect mortality in  
13  
14 a relatively young and healthy population, unlike older populations <sup>3</sup>. Furthermore, the "healthy  
15  
16 soldier effect" may result in submariners having a good initial health state, as military personnel  
17  
18 and submariners are specially selected to perform challenging tasks, which could diminish the  
19  
20 adverse effects of the submarine working environment <sup>10</sup>.  
21  
22  
23  
24  
25

26  
27 There are several limitations to the present study. First, the cross-sectional design precludes  
28  
29 any conclusions regarding the causality of the relationship between submarine service and risk of  
30  
31 multi-morbidity. However, it seems logical to assume that submarine work increases multi-  
32  
33 morbidity, rather than vice versa, because it is very unlikely that multi-morbidity would drive an  
34  
35 individual to submarine work. Second, the absence of a standardized definition led us to create  
36  
37 our own arbitrary definition for multi-morbidity ( $\geq 2$  coexisting chronic conditions in a single  
38  
39 patient), and it is possible that we underestimated or overestimated the prevalence of multi-  
40  
41 morbidity. Third, selection bias is possible, as it was not possible to blind the physicians to each  
42  
43 subject's status as a submariner or non-submariner. In addition, subjects who visited the clinic may  
44  
45 have had relatively poor health status, compared to other naval personnel who did not seek  
46  
47 medical attention. Fourth, the specificity of our study population (Korean submariners) and the  
48  
49  
50  
51  
52  
53  
54  
55  
56  
57  
58  
59  
60

1  
2  
3  
4 absence of an age-matched non-navy personnel control group, may limit the generalization of  
5  
6  
7 our findings to other populations.  
8  
9

10 In conclusion, this Korean study revealed that, compared to non-submarine service, submarine  
11  
12 service was significantly associated with a higher risk of multi-morbidity and greater disease  
13  
14 burden, even after adjusting for relevant covariates. These findings suggest that scrupulous  
15  
16 attention is needed to assess submariners and manage their health conditions in multi-  
17  
18 dimensional and holistic ways. Further research is needed to examine the effects of multi-  
19  
20 morbidity on disease patterns, quality of life, and overall mortality among submariners.  
21  
22  
23  
24  
25  
26  
27  
28

29 **Conflicts of interest:** None.  
30

31 **Acknowledgements:** None.  
32  
33

34 **Funding:** This study was supported by funding from the Armed Forces Medical Command, South  
35  
36 Korea.  
37  
38

39 **Data Sharing Statement:** Access to the dataset used in this study is restricted by Ministry of  
40  
41 National Defense, Republic of Korea.  
42  
43  
44  
45  
46  
47  
48  
49  
50  
51  
52  
53  
54  
55  
56  
57  
58  
59  
60

## References

1. Glynn LG, Valderas JM, Healy P, *et al.* The prevalence of multimorbidity in primary care and its effect on health care utilization and cost. *Family practice* 2011;28:516-23.
2. Fortin M, Bravo G, Hudon C, *et al.* Relationship between multimorbidity and health-related quality of life of patients in primary care. *Quality of Life Research* 2006;15:83-91.
3. Menotti A, Mulder I, Nissinen A, *et al.* Prevalence of morbidity and multimorbidity in elderly male populations and their impact on 10-year all-cause mortality: The FINE study (Finland, Italy, Netherlands, Elderly). *Journal of clinical epidemiology* 2001;54:680-6.
4. Organization WH. *World health statistics 2010*. World Health Organization, 2010.
5. van den Akker M, Buntinx F, Knottnerus JA. Comorbidity or multimorbidity: what's in a name? A review of literature. *The European Journal of General Practice* 1996;2:65-70.
6. Marengoni A, Angleman S, Melis R, *et al.* Aging with multimorbidity: a systematic review of the literature. *Ageing research reviews* 2011;10:430-9.
7. Taylor AW, Price K, Gill TK, *et al.* Multimorbidity-not just an older person's issue. Results from an Australian biomedical study. *BMC public health* 2010;10:1.
8. Barnett K, Mercer SW, Norbury M, *et al.* Epidemiology of multimorbidity and implications for health care, research, and medical education: a cross-sectional study. *The Lancet* 2012;380:37-43.
9. Prados-Torres A, Poblador-Plou B, Calderón-Larrañaga A, *et al.* Multimorbidity patterns in primary care: interactions among chronic diseases using factor analysis. *PloS one* 2012;7:e32190.
10. McLaughlin R, Nielsen L, Waller M. An evaluation of the effect of military service on mortality: quantifying the healthy soldier effect. *Ann Epidemiol* 2008;18:928-36.
11. Brasher KS, Dew AB, Kilminster SG, *et al.* Occupational stress in submariners: the impact of isolated and confined work on psychological well-being. *Ergonomics* 2010;53:305-13.
12. Hartwell J, Durocher N, Gertner J, *et al.* A comparison of the prevalence of metabolic syndrome among fast-attack submariners with us civilian males. 2009.
13. Sandal GM, Leon G, Palinkas L. Human challenges in polar and space environments. *Life in Extreme Environments* 2007:399-414.
14. Strand LA, Martinsen JI, Koefoed VF, *et al.* Cause-specific mortality and cancer incidence among 28 300 Royal Norwegian Navy servicemen followed for more than 50 years. *Scandinavian journal of work, environment & health* 2011:307-15.
15. Hammermeister I, Janus G, Schamarowski F, *et al.* Elevated risk of *Helicobacter pylori* infection in submarine crews. *European Journal of Clinical Microbiology and Infectious Diseases* 1992;11:9-14.
16. Inskip H, Snee M, Styles L. The mortality of Royal Naval submariners 1960-89. *Occupational and environmental medicine* 1997;54:209-15.

17. Oh SW. Obesity and metabolic syndrome in Korea. *Diabetes & metabolism journal* 2011;35:561-6.
18. Hudon C, Fortin M, Soubhi H. Abbreviated guidelines for scoring the Cumulative Illness Rating Scale (CIRS) in family practice. *Journal of clinical epidemiology* 2007;60:212. e1-. e4.
19. Linn BS, LINN MW, Gurel L. Cumulative illness rating scale. *Journal of the American Geriatrics Society* 1968;16:622-6.
20. Miller MD, Paradis CF, Houck PR, *et al.* Rating chronic medical illness burden in geropsychiatric practice and research: application of the Cumulative Illness Rating Scale. *Psychiatry research* 1992;41:237-48.
21. Fortin M, Bravo G, Hudon C, *et al.* Prevalence of multimorbidity among adults seen in family practice. *The Annals of Family Medicine* 2005;3:223-8.
22. Hudon C, Fortin M, Vanasse A. Cumulative Illness Rating Scale was a reliable and valid index in a family practice context. *Journal of clinical epidemiology* 2005;58:603-8.
23. van den Akker M, Buntinx F, Metsemakers JFM, *et al.* Multimorbidity in General Practice: Prevalence, Incidence, and Determinants of Co-Occurring Chronic and Recurrent Diseases. *Journal of Clinical Epidemiology* 1998;51:367-75.
24. Harrison C, Britt H, Miller G, *et al.* Examining different measures of multimorbidity, using a large prospective cross-sectional study in Australian general practice. *BMJ open* 2014;4:e004694.
25. Agborsangaya CB, Lau D, Lahtinen M, *et al.* Multimorbidity prevalence and patterns across socioeconomic determinants: a cross-sectional survey. *BMC public health* 2012;12:1.
26. Jan M, Thomas T, Hooper T. Prescription medication use aboard US submarines during periods underway. 2002.
27. Jee SH, Samet JM, Ohrr H, *et al.* Smoking and cancer risk in Korean men and women. *Cancer Causes & Control* 2004;15:341-8.
28. Gregg MA, Jankosky CJ. Physical readiness and obesity among male US Navy personnel with limited exercise availability while at sea. *Military medicine* 2012;177:1302-7.
29. Caban AJ, Lee DJ, Fleming LE, *et al.* Obesity in US Workers: The National Health Interview Survey, 1986 to 2002. *Am J Public Health* 2005;95:1614-22.
30. Deurenberg P, Yap M, Van Staveren WA. Body mass index and percent body fat: a meta analysis among different ethnic groups. *International Journal of Obesity & Related Metabolic Disorders* 1998;22.
31. Jee SH, Sull JW, Park J, *et al.* Body-mass index and mortality in Korean men and women. *New England Journal of Medicine* 2006;355:779-87.
32. Choi S-W, Lee J-H, Jang Y-K, *et al.* Assessment of ambulatory activity in the Republic of Korea Navy submarine crew. *Undersea & Hyperbaric Medicine* 2010;37:413.
33. De Bacquer D, Van Risseghem M, Clays E, *et al.* Rotating shift work and the metabolic syndrome: a prospective study. *International journal of epidemiology* 2009;38:848-54.

- 1
- 2
- 3
- 4 34. Ross R, Janssen I. Physical activity, total and regional obesity: dose-response
- 5 considerations. *Medicine and science in sports and exercise* 2001;33:S521-7; discussion S8-
- 6 9.
- 7
- 8 35. Reini SA. Hypercortisolism as a potential concern for submariners. *Aviation, space, and*
- 9 *environmental medicine* 2010;81:1114-22.
- 10
- 11 36. Hocking MB, Hocking D. *Air quality in airplane cabins and similar enclosed spaces.*
- 12 Springer Science & Business Media, 2005.
- 13
- 14 37. Burr, Ralph G Palinkas, Lawrence A. Health risks among submarine personnel in the US
- 15 Navy, 1974-1979. DTIC Document 1986
- 16
- 17
- 18
- 19
- 20
- 21
- 22
- 23
- 24
- 25
- 26
- 27
- 28
- 29
- 30
- 31
- 32
- 33
- 34
- 35
- 36
- 37
- 38
- 39
- 40
- 41
- 42
- 43
- 44
- 45
- 46
- 47
- 48
- 49
- 50
- 51
- 52
- 53
- 54
- 55
- 56
- 57
- 58
- 59
- 60

1  
2  
3  
4  
5  
6  
7  
8  
9  
10  
11  
12  
13  
14  
15  
16  
17  
18  
19  
20  
21  
22  
23  
24  
25  
26  
27  
28  
29  
30  
31  
32  
33  
34  
35  
36  
37  
38  
39  
40  
41  
42  
43  
44  
45  
46  
47  
48  
49  
50  
51  
52  
53  
54  
55  
56  
57  
58  
59  
60

For peer review only

Table 1. General and clinical characteristics of study subjects

|                                                | Overall<br>(N=590) | Non-submariner<br>(N=180) | Submariner<br>(N=410) | <i>P</i> -value* |
|------------------------------------------------|--------------------|---------------------------|-----------------------|------------------|
| Age, years, mean (SD)                          | 33.2(8.5)          | 31.2(9.9)                 | 34.1(7.7)             | <0.001           |
| Height, cm                                     | 173.8(0.1)         | 173.4(0.1)                | 174.0(0.1)            | 0.189            |
| Body mass index, kg/m <sup>2</sup> , mean (SD) | 25.0(3.0)          | 24.3(3.0)                 | 25.3(2.9)             | <0.001           |
| ≥25 kg/m <sup>2</sup> , N(%)                   | 267(45.3)          | 63(35.0)                  | 204(49.8)             | 0.001            |
| 18.5-24.9 kg/m <sup>2</sup> , N(%)             | 322(54.6)          | 116(64.4)                 | 206(50.2)             |                  |
| <18.5 kg/m <sup>2</sup> , N(%)                 | 1(0.2)             | 1(0.6)                    | 0(0)                  |                  |
| Alcohol consumption, N(%)                      | 487(82.5)          | 152(84.4)                 | 335(81.7)             | 0.420            |
| Current smoker, N(%)                           | 277(46.9)          | 68(37.8)                  | 209(51.0)             | 0.003            |
| Job-Ranking, N(%)                              |                    |                           |                       | <0001            |
| Officer                                        | 103(17.5)          | 31(17.2)                  | 72(17.6)              |                  |
| Petty officer                                  | 465(78.8)          | 127(70.6)                 | 338(82.4)             |                  |
| Navy civilian                                  | 22(3.7)            | 22(12.2)                  | 0(0%)                 |                  |
| Mean (SD) years of service in submarine        | NA                 | 0                         | 7.1(5.3)              | NA               |

N: number of subjects, SD: standard deviation, NA: not applicable

\* *P*-value was obtained from the t-test for continuous variables and chi-square test for categorical variables



Table 2. Comparison of the number of chronic health problems and mean Cumulative Illness Rating Scale (CIRS) score between submariners and non-submariners by age group

|                                                                   | Overall        |            |                  | <30 years      |            |                  | 30-39 years    |            |                  | ≥40 years      |            |                  |
|-------------------------------------------------------------------|----------------|------------|------------------|----------------|------------|------------------|----------------|------------|------------------|----------------|------------|------------------|
|                                                                   | Non-submariner | Submariner | <i>P</i> -value* |
| Chronic health problems, N (%)                                    |                |            |                  |                |            |                  |                |            |                  |                |            |                  |
| 0                                                                 | 96(53.3)       | 126(30.7)  | <0.001           | 62(61.4)       | 56(44.8)   | 0.009            | 17(51.5)       | 52(27.8)   | 0.012            | 17(37.0)       | 18(18.4)   | 0.005            |
| 1                                                                 | 63(35.0)       | 152(37.1)  |                  | 33(32.7)       | 47(37.6)   |                  | 12(36.4)       | 75(40.1)   |                  | 18(39.1)       | 30(30.6)   |                  |
| ≥2                                                                | 21(11.7)       | 132(32.2)  |                  | 6(5.9)         | 22(17.6)   |                  | 4(12.1)        | 60(32.1)   |                  | 11(23.9)       | 50(51.0)   |                  |
| Cumulative Illness Rating Scale score, mean (SD)                  |                |            |                  |                |            |                  |                |            |                  |                |            |                  |
|                                                                   | 1.66(1.16)     | 2.35(1.51) | <0.001           | 1.31(1.03)     | 1.70(1.23) | 0.010            | 1.64(1.0)      | 2.33(1.43) | 0.008            | 2.43(1.21)     | 3.23(1.59) | 0.003            |
| N: number, SD: standard deviation                                 |                |            |                  |                |            |                  |                |            |                  |                |            |                  |
| * <i>P</i> -value was obtained from the chi-square test or t-test |                |            |                  |                |            |                  |                |            |                  |                |            |                  |

1  
2  
3  
4  
5  
6  
7  
8  
9  
10  
11  
12  
13  
14  
15  
16  
17  
18  
19  
20  
21  
22  
23  
24  
25  
26  
27  
28  
29  
30  
31  
32  
33  
34  
35  
36  
37  
38  
39  
40  
41  
42  
43  
44  
45  
46  
47  
48  
49

Table 3. Association of submarine service with the risk of multi-morbidity<sup>†</sup> and high disease burden<sup>‡</sup>

|                                                                                                                         | Years of submarine service |                      |                      |                      | <i>P</i> <sub>trend</sub> <sup>¶</sup> |
|-------------------------------------------------------------------------------------------------------------------------|----------------------------|----------------------|----------------------|----------------------|----------------------------------------|
|                                                                                                                         | 0 year<br>(N=180)          | 1-4 years<br>(N=158) | 5-9 years<br>(N=107) | ≥10 years<br>(N=145) |                                        |
| OR (95% CI)* for the association with multi-morbidity <sup>†</sup>                                                      |                            |                      |                      |                      |                                        |
| Model 1                                                                                                                 | 1                          | 3.46(1.75-6.87)      | 2.59(1.37-4.89)      | 3.97(2.19-7.19)      | <0.001                                 |
| Model 2                                                                                                                 | 1                          | 3.97(1.91-8.25)      | 2.75(1.41-5.38)      | 3.78(2.06-6.94)      | <0.001                                 |
| OR (95% CI)* for the association with the high disease burden <sup>‡</sup> estimated by Cumulative Illness Rating Scale |                            |                      |                      |                      |                                        |
| Model 1                                                                                                                 | 1                          | 1.86(1.04-3.32)      | 2.36(1.37-4.05)      | 2.77(1.63-4.71)      | 0.001                                  |
| Model 2                                                                                                                 | 1                          | 2.19(1.19-4.02)      | 2.78(1.58-4.89)      | 2.94(1.71-5.04)      | 0.001                                  |

OR (95% CI): odds ratio (95% confidence interval)

\* estimated by multiple logistic regression analysis. In model 1, age was adjusted. In model 2, age, alcohol intake, smoking status (not included in the analysis for the disease burden), and job-ranking were adjusted.

<sup>†</sup> defined as two or more chronic health problems in a person

<sup>‡</sup> defined as Cumulative Illness Rating Scale (CIRS) score ≥ 3 <sup>¶</sup> assessed by linear regression analysis, with years of service as a continuous variable.

1  
2  
3  
4  
5  
6  
7  
8  
9  
10  
11  
12  
13  
14  
15  
16  
17  
18  
19  
20  
21  
22  
23  
24  
25  
26  
27  
28  
29  
30  
31  
32  
33  
34  
35  
36  
37  
38  
39  
40  
41  
42  
43  
44  
45  
46  
47  
48  
49

For peer review only

1  
2  
3  
4  
5  
6  
7  
8  
9  
10  
11  
12  
13  
14  
15  
16  
17  
18  
19  
20  
21  
22  
23  
24  
25  
26  
27  
28  
29  
30  
31  
32  
33  
34  
35  
36  
37  
38  
39  
40  
41  
42  
43  
44  
45  
46  
47  
48  
49

For peer review only

Supplementary table 1. Relationship between submarine service year and multi-morbidity and its burden  
: A subgroup analysis in submariners

|                                                                                                                         | Years of submarine service |                      |                      | P <sub>trend</sub> <sup>¶</sup> |
|-------------------------------------------------------------------------------------------------------------------------|----------------------------|----------------------|----------------------|---------------------------------|
|                                                                                                                         | 1-4 years<br>(N=158)       | 5-9 years<br>(N=107) | ≥10 years<br>(N=145) |                                 |
| OR (95% CI)* for the association with multi-morbidity <sup>†</sup>                                                      |                            |                      |                      |                                 |
| Model 1                                                                                                                 | 1                          | 0.78(0.38,1.61)      | 1.23(0.52,2.91)      | 0.286                           |
| Model 2                                                                                                                 | 1                          | 0.60(0.28,1.27)      | 0.69(0.26,1.82)      | 0.865                           |
| OR (95% CI)* for the association with the high disease burden <sup>‡</sup> estimated by Cumulative Illness Rating Scale |                            |                      |                      |                                 |
| Model 1                                                                                                                 | 1                          | 1.12(0.56,2.21)      | 1.21(0.52,2.80)      | 0.833                           |
| Model 2                                                                                                                 | 1                          | 0.89(0.44,1.83)      | 0.70(0.28,1.78)      | 0.272                           |

OR (95% CI): odds ratio (95% confidence interval)

\* estimated by multiple logistic regression analysis. In model 1, age was adjusted. In model 2, age, alcohol intake, smoking status (not included in the analysis for the disease burden), and job-ranking were adjusted.

<sup>†</sup> defined as two or more chronic health problems in a person

<sup>‡</sup> defined as Cumulative Illness Rating Scale score  $\geq 3$  <sup>¶</sup> assessed by linear regression analysis, for which year of service was put in the model as a continuous variable.

Supplementary Table 2. Distribution of symptoms in each organ domain of Cumulative Illness Rating Scale

| Organ domains                 | All Subjects   |            |          | After excluding smokers and obese subjects |            |          |
|-------------------------------|----------------|------------|----------|--------------------------------------------|------------|----------|
|                               | Non-submariner | Submariner | P-value* | Non-submariner                             | Submariner | P-value* |
|                               | N(%)           | N(%)       |          | N(%)                                       | N(%)       |          |
| Overall                       | 84(46.7)       | 284(69.3)  | <0.001   | 13(17.6)                                   | 38(35.8)   | 0.007    |
| Cardiac                       | 2(1.1)         | 4(1.0)     | 0.880    | 0(0)                                       | 1(0.9)     | 1.000    |
| Vascular                      | 21(11.7)       | 125(30.5)  | <0.001   | 6(8.1)                                     | 23(21.1)   | 0.023    |
| Respiratory                   | 74(41.1)       | 239(58.3)  | <0.001   | 6(8.1)                                     | 16(14.7)   | 0.180    |
| Eyes ear, nose, and throat    | 53(29.4)       | 85(20.7)   | 0.021    | 23(32.4)                                   | 21(19.3)   | 0.042    |
| Upper gastrointestinal tract  | 5(2.8)         | 8(2.0)     | 0.529    | 3(4.1)                                     | 1(0.9)     | 0.182    |
| Lower gastrointestinal tract  | 9(5.0)         | 12(2.9)    | 0.211    | 6(8.1)                                     | 5(4.6)     | 0.356    |
| Musculoskeletal or tegumental | 34(18.9)       | 96(23.4)   | 0.222    | 15(20.3)                                   | 22(20.2)   | 0.989    |
| Neurological                  | 5(2.8)         | 11(2.7)    | 0.948    | 1(1.4)                                     | 3(2.8)     | 0.648    |
| Endocrine, metabolic, breast  | 63(35.0)       | 211(51.5)  | <0.001   | 2(2.7)                                     | 11(10.1)   | 0.078    |
| Other organ                   | 4(2.2)         | 19(4.6)    | 0.163    | 3(4.1)                                     | 2(1.8)     | 0.395    |

N: number, SD: standard deviation

\* P-value was obtained by chi-square test or Fisher's exact test

1  
2  
3  
4  
5  
6  
7  
8  
9  
10  
11  
12  
13  
14  
15  
16  
17  
18  
19  
20  
21  
22  
23  
24  
25  
26  
27  
28  
29  
30  
31  
32  
33  
34  
35  
36  
37  
38  
39  
40  
41  
42  
43  
44  
45  
46  
47

For peer review only

STROBE Statement—Checklist of items that should be included in reports of *cross-sectional studies*

|                              | Item No | Recommendation                                                                                                                                                                                                                                                                                                                                                                                                                                              |
|------------------------------|---------|-------------------------------------------------------------------------------------------------------------------------------------------------------------------------------------------------------------------------------------------------------------------------------------------------------------------------------------------------------------------------------------------------------------------------------------------------------------|
| <b>Title and abstract</b>    | 1       | (a) Indicate the study's design with a commonly used term in the title or the abstract : <b>checked, page 1</b><br>(b) Provide in the abstract an informative and balanced summary of what was done and what was found : <b>checked, page 3</b>                                                                                                                                                                                                             |
| <b>Introduction</b>          |         |                                                                                                                                                                                                                                                                                                                                                                                                                                                             |
| Background/rationale         | 2       | Explain the scientific background and rationale for the investigation being reported : <b>checked, page 5-6</b>                                                                                                                                                                                                                                                                                                                                             |
| Objectives                   | 3       | State specific objectives, including any prespecified hypotheses : <b>checked, page 6</b>                                                                                                                                                                                                                                                                                                                                                                   |
| <b>Methods</b>               |         |                                                                                                                                                                                                                                                                                                                                                                                                                                                             |
| Study design                 | 4       | Present key elements of study design early in the paper : <b>checked, Page 6</b>                                                                                                                                                                                                                                                                                                                                                                            |
| Setting                      | 5       | Describe the setting, locations, and relevant dates, including periods of recruitment, exposure, follow-up, and data collection : <b>checked, Page 6</b>                                                                                                                                                                                                                                                                                                    |
| Participants                 | 6       | (a) Give the eligibility criteria, and the sources and methods of selection of participants : <b>checked, Page 6</b>                                                                                                                                                                                                                                                                                                                                        |
| Variables                    | 7       | Clearly define all outcomes, exposures, predictors, potential confounders, and effect modifiers. Give diagnostic criteria, if applicable : <b>checked, page 7-8</b>                                                                                                                                                                                                                                                                                         |
| Data sources/<br>measurement | 8*      | For each variable of interest, give sources of data and details of methods of assessment (measurement). Describe comparability of assessment methods if there is more than one group : <b>checked, page 7-8</b>                                                                                                                                                                                                                                             |
| Bias                         | 9       | Describe any efforts to address potential sources of bias : <b>checked, page 15</b>                                                                                                                                                                                                                                                                                                                                                                         |
| Study size                   | 10      | Explain how the study size was arrived at : <b>N/A</b>                                                                                                                                                                                                                                                                                                                                                                                                      |
| Quantitative variables       | 11      | Explain how quantitative variables were handled in the analyses. If applicable, describe which groupings were chosen and why : <b>checked, page 9</b>                                                                                                                                                                                                                                                                                                       |
| Statistical methods          | 12      | (a) Describe all statistical methods, including those used to control for confounding : <b>checked, page 9</b><br>(b) Describe any methods used to examine subgroups and interactions : <b>checked, page 9</b><br>(c) Explain how missing data were addressed : <b>checked, page 6</b><br>(d) If applicable, describe analytical methods taking account of sampling strategy, <b>N/A</b><br>(e) Describe any sensitivity analyses : <b>checked, page 10</b> |
| <b>Results</b>               |         |                                                                                                                                                                                                                                                                                                                                                                                                                                                             |
| Participants                 | 13*     | (a) Report numbers of individuals at each stage of study—eg numbers potentially eligible, examined for eligibility, confirmed eligible, included in the study, completing follow-up, and analysed : <b>Page 6</b><br>(b) Give reasons for non-participation at each stage : <b>checked, page 6</b><br>(c) Consider use of a flow diagram : <b>N/A</b>                                                                                                       |
| Descriptive data             | 14*     | (a) Give characteristics of study participants (eg demographic, clinical, social) and information on exposures and potential confounders : <b>checked, page 10</b><br>(b) Indicate number of participants with missing data for each variable of interest : <b>checked, Page 6</b>                                                                                                                                                                          |
| Outcome data                 | 15*     | Report numbers of outcome events or summary measures : <b>checked, page 10</b>                                                                                                                                                                                                                                                                                                                                                                              |
| Main results                 | 16      | (a) Give unadjusted estimates and, if applicable, confounder-adjusted estimates and their precision (eg, 95% confidence interval). Make clear which confounders were                                                                                                                                                                                                                                                                                        |



|                          |    |                                                                                                                                                                                                         |
|--------------------------|----|---------------------------------------------------------------------------------------------------------------------------------------------------------------------------------------------------------|
|                          |    | adjusted for and why they were included : <b>checked, page 9-10</b>                                                                                                                                     |
|                          |    | (b) Report category boundaries when continuous variables were categorized :<br><b>checked, page 8</b>                                                                                                   |
|                          |    | (c) If relevant, consider translating estimates of relative risk into absolute risk for a meaningful time period : N/A                                                                                  |
| Other analyses           | 17 | Report other analyses done—eg analyses of subgroups and interactions, and sensitivity analyses : <b>checked, page 10</b>                                                                                |
| <b>Discussion</b>        |    |                                                                                                                                                                                                         |
| Key results              | 18 | Summarise key results with reference to study objectives : <b>checked, page 11</b>                                                                                                                      |
| Limitations              | 19 | Discuss limitations of the study, taking into account sources of potential bias or imprecision. Discuss both direction and magnitude of any potential bias : <b>checked, page 15</b>                    |
| Interpretation           | 20 | Give a cautious overall interpretation of results considering objectives, limitations, multiplicity of analyses, results from similar studies, and other relevant evidence : <b>checked, page 13-15</b> |
| Generalisability         | 21 | Discuss the generalisability (external validity) of the study results : <b>checked, page 15</b>                                                                                                         |
| <b>Other information</b> |    |                                                                                                                                                                                                         |
| Funding                  | 22 | Give the source of funding and the role of the funders for the present study and, if applicable, for the original study on which the present article is based : <b>checked, page 16</b>                 |

\*Give information separately for exposed and unexposed groups.

**Note:** An Explanation and Elaboration article discusses each checklist item and gives methodological background and published examples of transparent reporting. The STROBE checklist is best used in conjunction with this article (freely available on the Web sites of PLoS Medicine at <http://www.plosmedicine.org/>, Annals of Internal Medicine at <http://www.annals.org/>, and Epidemiology at <http://www.epidem.com/>). Information on the STROBE Initiative is available at [www.strobe-statement.org](http://www.strobe-statement.org).
