# Supplementary material for: The association between submarine service and multimorbidity: a cross-sectional study of Korean naval personnel
Source: PubMed Central journal article supplement — BMJ Open. 2017 Sep 24;7(9):e017776. doi: 10.1136/bmjopen-2017-017776 (PMC5623552; doi:10.1136/bmjopen-2017-017776), 2017-09-24
Supplement: bmjopen-2017-017776supp001.pdf [file bmjopen-2017-017776supp001.pdf]

Supplementary table 1. Relationship between submarine service year and multi-morbidity and its burden  
: A subgroup analysis in submariners

|                                                                                                                         | Years of submarine service |                      |                      | P <sub>trend</sub> <sup>¶</sup> |
|-------------------------------------------------------------------------------------------------------------------------|----------------------------|----------------------|----------------------|---------------------------------|
|                                                                                                                         | 1-4 years<br>(N=158)       | 5-9 years<br>(N=107) | ≥10 years<br>(N=145) |                                 |
| OR (95% CI)* for the association with multi-morbidity <sup>†</sup>                                                      |                            |                      |                      |                                 |
| Model 1                                                                                                                 | 1                          | 0.78(0.38,1.61)      | 1.23(0.52,2.91)      | 0.286                           |
| Model 2                                                                                                                 | 1                          | 0.60(0.28,1.27)      | 0.69(0.26,1.82)      | 0.865                           |
| OR (95% CI)* for the association with the high disease burden <sup>‡</sup> estimated by Cumulative Illness Rating Scale |                            |                      |                      |                                 |
| Model 1                                                                                                                 | 1                          | 1.12(0.56,2.21)      | 1.21(0.52,2.80)      | 0.833                           |
| Model 2                                                                                                                 | 1                          | 0.89(0.44,1.83)      | 0.70(0.28,1.78)      | 0.272                           |

OR (95% CI): odds ratio (95% confidence interval)

\* estimated by multiple logistic regression analysis. In model 1, age was adjusted. In model 2, age, alcohol intake, smoking status (not included in the analysis for the disease burden), and job-ranking were adjusted.

† defined as two or more chronic health problems in a person

‡ defined as Cumulative Illness Rating Scale score ≥ 3 ¶ assessed by linear regression analysis, for which year of service was put in the model as a continuous variable.

Supplementary Table 2. Distribution of symptoms in each organ domain of Cumulative Illness Rating Scale

| Organ domains                 | All Subjects   |            |          | After excluding smokers and obese subjects |            |          |
|-------------------------------|----------------|------------|----------|--------------------------------------------|------------|----------|
|                               | Non-submariner | Submariner | P-value* | Non-submariner                             | Submariner | P-value* |
|                               | N(%)           | N(%)       |          | N(%)                                       | N(%)       |          |
| Overall                       | 84(46.7)       | 284(69.3)  | <0.001   | 13(17.6)                                   | 38(35.8)   | 0.007    |
| Cardiac                       | 2(1.1)         | 4(1.0)     | 0.880    | 0(0)                                       | 1(0.9)     | 1.000    |
| Vascular                      | 21(11.7)       | 125(30.5)  | <0.001   | 6(8.1)                                     | 23(21.1)   | 0.023    |
| Respiratory                   | 74(41.1)       | 239(58.3)  | <0.001   | 6(8.1)                                     | 16(14.7)   | 0.180    |
| Eyes ear, nose, and throat    | 53(29.4)       | 85(20.7)   | 0.021    | 23(32.4)                                   | 21(19.3)   | 0.042    |
| Upper gastrointestinal tract  | 5(2.8)         | 8(2.0)     | 0.529    | 3(4.1)                                     | 1(0.9)     | 0.182    |
| Lower gastrointestinal tract  | 9(5.0)         | 12(2.9)    | 0.211    | 6(8.1)                                     | 5(4.6)     | 0.356    |
| Musculoskeletal or tegumental | 34(18.9)       | 96(23.4)   | 0.222    | 15(20.3)                                   | 22(20.2)   | 0.989    |
| Neurological                  | 5(2.8)         | 11(2.7)    | 0.948    | 1(1.4)                                     | 3(2.8)     | 0.648    |
| Endocrine, metabolic, breast  | 63(35.0)       | 211(51.5)  | <0.001   | 2(2.7)                                     | 11(10.1)   | 0.078    |
| Other organ                   | 4(2.2)         | 19(4.6)    | 0.163    | 3(4.1)                                     | 2(1.8)     | 0.395    |

N: number, SD: standard deviation

\* P-value was obtained by chi-square test or Fisher's exact test
